# Supplementary material for: N-Heterocyclic carbene catalyzed regioselective oxo-acyloxylation of alkenes with aromatic aldehydes: a high yield synthesis of α-acyloxy ketones and esters
Source: Royal Society of Chemistry journal article supplement (doi:10.1039/c3ob41551a), 2013-01-01

## **Electronic Supplementary Information (ESI)**

### **“N-Heterocyclic Carbene Catalyzed highly regioselective oxo-acyloxylation of alkenes: a facile entry to $\alpha$ -acyloxy carbonyls”**

**Rambabu N. Reddi, Pushpa V. Malekar and Arumugam Sudalai\***

Chemical Engineering and Process Development Division, National Chemical Laboratory,  
Pashan Road, Pune 411008, INDIA.

**\*Corresponding author. Tel: +91-20-25902174; Fax: +91-20-25902676; e-mail:**  
**[a.sudalai@ncl.res.in](mailto:a.sudalai@ncl.res.in)**

### **Table of Contents**

| <b>Sr.No.</b> | <b>Description</b>   |       |
|---------------|----------------------|-------|
| 1             | General information  | 2     |
| 2             | Experimental section | 2-9   |
| 3             | Spectra              | 10-33 |

## 1. General Information

Solvents were purified and dried by standard procedures before use. IR spectra were recorded on a Perkin-Elmer model 683 B and absorption is expressed in  $\text{cm}^{-1}$ .  $^1\text{H}$  NMR and  $^{13}\text{C}$  NMR spectra were recorded on Bruker AC-200 spectrometer unless mentioned otherwise. Purification was done using column chromatography (100-200 mesh). ESI-MS were recorded on a Thermo Finnigan LCQ Advantage spectrometer in ESI mode with a spray voltage of 4.8 kV. All chemicals are purchased from Sigma-Aldrich and used without further purification.

## 2. Experimental section

### 2.1. General experimental procedure:

To a stirred solution of alkene (5 mmol) in dry DMSO (35 mL), NBS (5 mmol), *N*-heterocyclic carbene precursor **1g** (10 mol %) and  $\text{Et}_3\text{N}$  (6 mmol), aromatic aldehyde (5.5 mmol) was added and the reaction mixture was then stirred at 25 °C under an  $\text{O}_2$  atmosphere. After completion of the reaction as monitored by TLC, it was quenched with  $\text{H}_2\text{O}$  (50 mL) at 0 °C. It was then extracted with EtOAc (3 x 50 mL) followed by washing with brine (3x50 mL) and the combined organic layers were dried over anhydrous  $\text{Na}_2\text{SO}_4$ . Removal of solvent gave the crude product, which was purified by column chromatography over silica gel using pet ether/EtOAc (9:1) as eluent to obtain  $\alpha$ -acyloxy carbonyl compounds **4a-v** in high purity.

**2-Oxo-2-phenylethyl 4-nitrobenzoate (4a):** Yield: 92%, colorless solid, Mp: 123-124 °C ; **IR** (Nujol,  $\text{cm}^{-1}$ ): 719, 1104, 1229, 1294, 1376, 1462, 1524, 1598, 1696, 1727, 275, 2840, 2923;  **$^1\text{H}$  NMR** (200 MHz,  $\text{CDCl}_3$ ):  $\delta$  5.64 (s, 2H), 7.51 - 7.55 (m, 2H), 7.63 - 7.65 (m, 1H), 7.97 (d,  $J$  = 8.5 Hz, 2H), 8.33 (s, 4H);  **$^{13}\text{C}$  NMR** (50 MHz,  $\text{CDCl}_3$ ) :  $\delta$  66.9, 123.4, 127.7, 128.9, 130.9, 133.8, 134.0, 134.7, 150.6, 164.0, 191.0; **HRMS (ESI):**  $[\text{M}+\text{H}]^+$  calcd for  $\text{C}_{15}\text{H}_{11}\text{NO}_5+\text{H}$ : 286.0715; found: 286.0726.

**2-(4-Methylphenyl)-2-oxoethyl 4-nitrobenzoate (4b):** Yield: 77%, colorless solid, Mp: 114-115 °C; **IR** (Nujol,  $\text{cm}^{-1}$ ): 713, 1135, 1231, 1289, 1374, 1459, 1525, 1604, 1692, 1725, 2840, 2923;  **$^1\text{H}$  NMR** (200 MHz,  $\text{CDCl}_3$ ):  $\delta$  2.46 (s, 3H), 5.62 (s, 2H), 7.32 (d,  $J$  = 8.1 Hz, 2H), 7.87 (d,  $J$  = 8.1 Hz, 2H), 8.33 (s, 4H);  **$^{13}\text{C}$  NMR** (50 MHz,  $\text{CDCl}_3$ ):  $\delta$  21.8, 66.9, 123.5, 127.8, 129.6, 131.1, 131.5, 134.8, 145.1, 150.7, 164.1, 190.6; **HRMS (ESI):**  $[\text{M}+\text{H}]^+$  calcd for:  $\text{C}_{16}\text{H}_{13}\text{NO}_5+\text{H}$  : 300.0872; found: 300.0881.

**2-(4-Bromophenyl)-2-oxoethyl 4-nitrobenzoate (4c):** Yield: 71%, colorless solid, Mp: 117-118 °C; **IR** ( $\text{CHCl}_3$ ,  $\text{cm}^{-1}$ ): 717, 967, 1106, 1124, 1346, 1521, 1701, 1723, 2850, 2920;  **$^1\text{H}$  NMR** (200 MHz,  $\text{CDCl}_3$ ):  $\delta$  5.58 (s, 2H), 7.67 (m,  $J$  = 8.5 Hz, 2H), 7.83 (m,  $J$  = 8.5 Hz, 2H), 8.32 (s, 4H);  **$^{13}\text{C}$  NMR** (100 MHz,  $\text{CDCl}_3$ ) :  $\delta$  66.7, 123.6, 129.2, 129.5, 131.1, 132.4, 132.6, 134.6, 150.8, 164.0, 190.0; **HRMS (ESI):**  $[\text{M}+\text{H}]^+$  calcd for  $\text{C}_{15}\text{H}_{10}\text{BrNNaO}_5+\text{H}$ : 363.9820; found: 363.9834.

**2-(4-Fluorophenyl)-2-oxoethyl 4-nitrobenzoate (4d):** Yield: 79%, colorless solid, Mp: 117-118 °C ; **IR** ( $\text{CHCl}_3$ ,  $\text{cm}^{-1}$ ): 717, 871, 1131, 1155, 1231, 1320, 1521, 1595, 1698, 1722, 1746;  **$^1\text{H}$  NMR** (400 MHz,  $\text{CDCl}_3$ ):  $\delta$  5.59 (s, 2H), 7.21 (t,  $J$  = 8.6 Hz, 2H), 8.01 (dd,  $J$  = 8.6,  $J$  = 5.0 Hz, 2H), 8.32 (d,  $J$  = 2.7 Hz, 4H);  **$^{13}\text{C}$  NMR** (100 MHz,  $\text{CDCl}_3$ ):  $\delta$  66.7, 116.1, 116.4, 130.5, 130.5,

131.1, 134.6, 150.8, 164.0, 165.0, 167.5, 189.3; **HRMS (ESI):**  $[M+H]^+$  calcd for  $C_{15}H_{10}FNO_5+H$ : 304.0621; found: 304.0627.

**2-(4-Acetoxyphenyl)-2-oxoethyl 4-nitrobenzoate (4e):** Yield: 82%, colorless solid, Mp: 128-129 °C; **IR** (Nujol,  $cm^{-1}$ ): 716, 1166, 1212, 1294, 1374, 1459, 1525, 1596, 1690, 1717, 1753, 2846, 2917;  **$^1H$  NMR** (200 MHz,  $CDCl_3$ ):  $\delta$  2.35 (s, 3H), 5.61 (s, 2H), 7.26 (d,  $J = 8.6$  Hz, 2H), 8.01 (d,  $J = 8.6$  Hz, 2H), 8.32 (s, 4H);  **$^{13}C$  NMR** (100 MHz,  $CDCl_3$ ):  $\delta$  21.0, 66.7, 122.2, 123.5, 129.3, 131.0, 131.3, 134.6, 150.6, 155.0, 164.0, 168.4, 189.9; **HRMS (ESI):**  $[M+H]^+$  calcd for  $C_{17}H_{13}NO_7+H$ : 344.0770; found: 344.0778.

**2-(3, 4 Dimethoxyphenyl)-2-oxoethyl 4-nitrobenzoate (4f):** Yield: 74%, colorless solid, Mp: 162-163 °C; **IR** (Nujol,  $cm^{-1}$ ): 720, 1021, 1131, 1255, 1376, 1460, 1524, 1684, 1725, 2855, 2925;  **$^1H$  NMR** (200 MHz,  $CDCl_3$ ):  $\delta$  3.95 (s, 3H), 3.98 (s, 3H), 5.60 (s, 2H), 6.92 (d,  $J = 8.3$  Hz, 1H), 7.51 - 7.54 (m, 2H), 8.33 (s, 4H);  **$^{13}C$  NMR** (100 MHz,  $CDCl_3$ ):  $\delta$  55.9, 56.0, 66.6, 110.0, 110.1, 122.1, 123.6, 127.1, 131.0, 134.9, 149.5, 150.8, 154.1, 164.1, 189.5; **HRMS (ESI):**  $[M+H]^+$  calcd for  $C_{17}H_{15}NO_7+H$ : 346.0922; found: 346.0927.

**1-Oxo-2, 3-dihydro-1H-inden-2-yl 4-nitrobenzoate (4g):** Yield: 72%, colorless solid, Mp: 199-200 °C ; **IR** (Nujol,  $cm^{-1}$ ): 713, 1122, 1273, 1349, 1374, 1522, 1604, 1709, 1722, 2846, 2923;  **$^1H$  NMR** (200 MHz,  $CDCl_3$ ):  $\delta$  3.23 (dd,  $J = 17.0, 4.9$  Hz, 1H), 3.82 (dd,  $J = 17.0, 8.1$  Hz, 1H), 5.70 (dd,  $J = 8.1, 4.9$  Hz, 1H), 7.44 - 7.53 (m, 2H), 7.68 (d,  $J = 7.7$  Hz, 1H), 7.86 (d,  $J = 7.7$  Hz, 1H), 8.30 (s, 4H);  **$^{13}C$  NMR** (125 MHz,  $CDCl_3$ ):  $\delta$  33.4, 75.0, 123.6, 124.7, 126.7, 128.4, 131.1, 134.5, 134.7, 136.1, 150.1, 150.9, 164.1, 199.3; **HRMS (ESI):**  $[M+H]^+$  calcd for:  $C_{16}H_{12}NO_5+H$ : 298.0715; found: 298.0720.

**2-Oxo-1,2-diphenylethyl 4-nitrobenzoate (4h):** Yield: 81%, colorless solid, Mp: 114-115 °C; IR (Nujol,  $\text{cm}^{-1}$ ): 762, 1097, 1288, 1341, 1374, 1462, 1522, 1692, 1720, 2851, 2923;  $^1\text{H NMR}$  (200 MHz,  $\text{CDCl}_3$ ):  $\delta$  7.13 (s, 1H), 7.41 - 7.58 (m, 8H), 7.99 (d,  $J = 7.2$  Hz, 2H), 8.28 (s, 4H);  $^{13}\text{C NMR}$  (50 MHz,  $\text{CDCl}_3$ ):  $\delta$  78.7, 123.5, 128.7, 128.8, 129.3, 129.7, 131.1, 133.2, 133.6, 134.4, 134.8, 150.7, 164.0, 192.6; **HRMS (ESI):**  $[\text{M}+\text{Na}]^+$  calcd for:  $\text{C}_{21}\text{H}_{15}\text{NO}_5+\text{Na}$ : 384.0848; found: 384.0853.

**1-Oxo-1-phenylpropan-2-yl 4-nitrobenzoate (4i):** Yield: 81%, colorless solid, Mp: 119-120°C; IR (Nujol,  $\text{cm}^{-1}$ ): 721, 965, 1122, 1270, 1374, 1462, 1522, 1599, 1692, 1725, 2851, 2923;  $^1\text{H NMR}$  (200 MHz,  $\text{CDCl}_3$ ):  $\delta$  1.72 (d,  $J = 6.9$  Hz, 3H), 6.23 (q,  $J = 6.9$  Hz, 1H), 7.52 - 7.63 (m, 3H), 7.97 - 8.01 (m, 2H), 8.29 - 8.30 (m, 4H);  $^{13}\text{C NMR}$  (100 MHz,  $\text{CDCl}_3$ ):  $\delta$  17.2, 72.6, 123.4, 128.4, 128.8, 130.9, 133.7, 134.8, 150.6, 163.9, 195.5; **HRMS (ESI):**  $[\text{M}+\text{H}]^+$  calcd for:  $\text{C}_{16}\text{H}_{13}\text{NO}_5+\text{H}$ : 300.0872; found: 300.0877.

**3-((Tert-butyldimethylsilyloxy)-1-oxo-1-phenylpropan-2-yl 4-nitro benzoate (4j):** Yield: 92%, colorless solid, Mp: 77-78 °C; IR (Nujol,  $\text{cm}^{-1}$ ): 718, 839, 1270, 1371, 1459, 1530, 1695, 1733, 2851, 2917;  $^1\text{H NMR}$  (200 MHz,  $\text{CDCl}_3$ ):  $\delta$  0.00 (s, 3H), 0.02 (s, 3H), 0.82 (s, 9H), 4.18 (d,  $J = 5.1$  Hz, 2H), 6.25 (t,  $J = 5.1$  Hz, 1H), 7.47 - 7.62 (m, 3H), 8.00 - 8.04 (m, 2H), 8.29 - 8.30 (m, 4H);  $^{13}\text{C NMR}$  (100 MHz,  $\text{CDCl}_3$ ):  $\delta$  -5.4, 18.1, 25.6, 29.7, 62.9, 77.3, 123.5, 128.5, 128.7, 131.0, 133.7, 134.8, 135.2, 150.7, 163.9, 194.4; **HRMS (ESI):**  $[\text{M}+\text{H}]^+$  calcd for:  $\text{C}_{22}\text{H}_{27}\text{NO}_6\text{Si}+\text{H}$ : 430.1686; found: 430.1689.

**3-(Benzyloxy)-2-oxopropyl 4-nitrobenzoate (4k)** Yield: 79%, colorless solid, Mp: 83-84 °C; IR (Nujol,  $\text{cm}^{-1}$ ): 718, 1083, 1283, 1374, 1459, 1517, 1722, 1739, 2851, 2823;  $^1\text{H NMR}$  (200 MHz,  $\text{CDCl}_3$ ):  $\delta$  4.21 (s, 2H), 4.64 (s, 2H), 5.23 (s, 2H), 7.37 (s, 5H), 8.28 (d,  $J = 4.3$  Hz, 4H);

**<sup>13</sup>C NMR** (125 MHz, CDCl<sub>3</sub>): δ 67.8, 73.8, 73.9, 123.5, 127.9, 128.3, 128.6, 130.9, 134.6, 136.5, 150.7, 163.8, 200.8; **HRMS (ESI)**: [M+Na]<sup>+</sup> calcd for C<sub>17</sub>H<sub>15</sub>NO<sub>6</sub>+Na: 352.0796; found: 352.0801.

**2-Oxo-octyl 4-nitrobenzoate (4l)**: **Yield**: 71%, colorless solid, Mp: 75-76 °C; **IR** (Nujol, cm<sup>-1</sup>): 717, 1121, 1272, 1352, 1377, 1463, 1536, 1543, 1722, 1733, 2854, 2923; **<sup>1</sup>H NMR** (200 MHz, CDCl<sub>3</sub>): δ 0.87 - 0.93 (m, 3H), 1.26 - 1.31 (br. s, 6H), 1.67 - 1.70 (m, 2H), 2.49 (t, *J* = 7.3 Hz, 2H), 4.94 (s, 2H), 8.24 - 8.35 (m, 4H); **<sup>13</sup>C NMR** (125 MHz, CDCl<sub>3</sub>): δ 13.9, 22.4, 23.2, 28.7, 31.5, 38.7, 68.7, 123.5, 130.9, 134.6, 150.7, 163.8, 202.4; **HRMS (ESI)**: [M+H]<sup>+</sup> calcd for C<sub>15</sub>H<sub>19</sub>NO<sub>5</sub>+H: 294.1341; found: 294.1347.

**2-Oxodecyl 4-nitrobenzoate (4m)**: **Yield**: 76%, colorless solid, Mp: 76-77 °C; **IR** (Nujol, cm<sup>-1</sup>): 713, 1119, 1270, 1374, 1459, 1541, 1610, 1717, 1736, 2857, 2928; **<sup>1</sup>H NMR** (200 MHz, CDCl<sub>3</sub>): δ 0.85 - 0.92 (m, 3H), 1.29 (br. s., 10H), 1.66 (t, *J* = 7.2 Hz, 2H), 2.49 (t, *J* = 7.2 Hz, 2H), 4.94 (s, 2H), 8.24 - 8.35 (m, 4H); **<sup>13</sup>C NMR** (50 MHz, CDCl<sub>3</sub>): δ 14.0, 22.5, 23.2, 29.0, 29.0, 29.2, 31.7, 38.6, 68.6, 123.4, 130.8, 134.6, 150.6, 163.7, 202.2; **HRMS (ESI)**: [M+H]<sup>+</sup> calcd for C<sub>17</sub>H<sub>23</sub>NO<sub>5</sub>+H: 322.1654; found: 322.1656.

**2-Oxo-4-phenylbutyl 4-nitrobenzoate (4n)**: **Yield**: 74%, colorless solid, Mp: 112-113 °C; **IR** (Nujol, cm<sup>-1</sup>): 724, 1089, 1131, 1273, 1347, 1377, 1462, 1523, 1600, 1718, 1732, 2855, 2926; **<sup>1</sup>H NMR** (200 MHz, CDCl<sub>3</sub>): δ 2.79 - 2.87 (m, 2H), 2.95 - 3.03 (m, 2H), 4.91 (s, 2H), 7.21 - 7.31 (m, 5H), 8.27 - 8.34 (m, 4H); **<sup>13</sup>C NMR** (50 MHz, CDCl<sub>3</sub>): δ 29.2, 40.4, 68.8, 123.6, 126.4, 128.2, 128.6, 131.0, 138.0, 140.2, 150.8, 163.9, 201.7; **HRMS (ESI)**: [M+Na]<sup>+</sup> calcd for: C<sub>17</sub>H<sub>15</sub>NO<sub>5</sub>+Na: 336.0848; found: 336.0856.

**2-Ethoxy-2-oxoethyl 4-nitrobenzoate (4o): Yield:** 78%, yellow liquid; **IR** (neat,  $\text{cm}^{-1}$ ): 2926, 2983, 1759, 1738, 1732, 1608, 1531, 1349, 1285, 1213, 1121, 1018, 857, 718;  **$^1\text{H}$  NMR** (200 MHz,  $\text{CDCl}_3$ ):  $\delta$  1.33 (t,  $J = 7.1$  Hz, 3H), 4.28 (q,  $J = 7.1$  Hz, 2H), 4.89 (s, 2H), 8.25 - 8.36 (m, 4H);  **$^{13}\text{C}$  NMR** (50 MHz,  $\text{CDCl}_3$ ):  $\delta$  14.1, 61.5, 123.5, 131.0, 134.5, 150.8, 163.9, 166.9; **HRMS (ESI):**  $[\text{M}+\text{Na}]^+$  calcd for  $\text{C}_{11}\text{H}_{11}\text{NO}_6+\text{Na}$ : 276.0484; found: 276.0446.

**2-Oxotetrahydro-2H-pyran-3-yl 4-nitrobenzoate (4p): Yield:** 69%, colorless solid, Mp: 136-137 °C; **IR** (Nujol,  $\text{cm}^{-1}$ ): 718, 1124, 1273, 1377, 1456, 1511, 1602, 1725, 1753, 2857, 2912;  **$^1\text{H}$  NMR** (200 MHz,  $\text{CDCl}_3$ ):  $\delta$  2.14 - 2.20 (m, 3H), 2.51 - 2.76 (m, 1H), 4.43 - 4.49 (m, 2H), 5.61 - 5.67 (m, 1H), 8.25 - 8.35 (m, 4H);  **$^{13}\text{C}$  NMR** (50 MHz,  $\text{CDCl}_3$ ):  $\delta$  21.3, 24.8, 68.2, 68.2, 123.5, 131.0, 134.5, 150.7, 163.4, 168.1; **HRMS (ESI):**  $[\text{M}+\text{H}]^+$  calcd for  $\text{C}_{12}\text{H}_{11}\text{NO}_6+\text{H}$ : 266.0664; found: 266.0663

**2-(Methoxy)-2-oxo-1-phenylethyl 4-nitrobenzoate (4q): Yield:** 72%, yellow liquid; **IR** ( $\text{CHCl}_3$ ,  $\text{cm}^{-1}$ ): 718, 1101, 1167, 1269, 1346, 1368, 1508, 1527, 1606, 1731, 1760;  **$^1\text{H}$  NMR** (500 MHz,  $\text{CDCl}_3$ ):  $\delta$  3.80 (s, 3H), 6.20 (s, 1H), 7.47 - 7.48 (m, 3H), 7.59 - 7.60 (m, 2H), 8.32 (s, 4H);  **$^{13}\text{C}$  NMR** (125 MHz,  $\text{CDCl}_3$ ):  $\delta$  52.6, 75.4, 123.5, 127.7, 128.9, 129.5, 131.0, 133.3, 134.5, 150.8, 163.7, 168.5; **HRMS (ESI):**  $[\text{M}+\text{Na}]^+$  calcd for  $\text{C}_{16}\text{H}_{13}\text{NO}_6+\text{Na}$ : 338.0641; found: 338.0649.

**2-Oxo-2-phenylethyl benzoate (4r): Yield:** 68%, colorless solid, Mp: 119-120 °C ; **IR** (Nujol,  $\text{cm}^{-1}$ ): 705, 1015, 1374, 1459, 1596, 1714, 1750, 2851, 2923;  **$^1\text{H}$  NMR** (200 MHz,  $\text{CDCl}_3$ ):  $\delta$  5.58 (s, 2H), 7.48 - 7.61 (m, 6H), 7.97 - 8.00 (m, 2H), 8.13 - 8.17 (m, 2H);  **$^{13}\text{C}$  NMR** (50 MHz,  $\text{CDCl}_3$ ):  $\delta$  66.2, 127.6, 128.2, 128.73 , 129.8, 130.1, 133.1, 133.6, 134.1, 165.7, 191.6; **HRMS (ESI):**  $[\text{M}+\text{Na}]^+$  calcd for  $\text{C}_{15}\text{H}_{12}\text{O}_3+\text{Na}$ : 263.0683; found: 263.0692.

**2-Oxo-2-phenylethyl 3-methylbenzoate (4s):** Yield: 81%, colorless solid, Mp: 94-95°C; **IR** (Nujol,  $\text{cm}^{-1}$ ): 743, 814, 957, 1083, 1198, 1369, 1451, 1585, 1684, 1714, 2857, 2917;  **$^1\text{H}$  NMR** (200 MHz,  $\text{CDCl}_3$ ):  $\delta$  2.38 (s, 3H), 5.52 (s, 2H), 7.31 - 7.48 (m, 5H), 7.90 - 7.95 (m, 4H);  **$^{13}\text{C}$  NMR** (100 MHz,  $\text{CDCl}_3$ ):  $\delta$  21.1, 66.2, 127.0, 127.6, 128.2, 128.7, 129.2, 130.3, 133.6, 133.9, 134.1, 137.9, 165.8, 191.7; **HRMS (ESI):**  $[\text{M}+\text{Na}]^+$  calcd for  $\text{C}_{16}\text{H}_{14}\text{O}_3+\text{Na}$ : 277.0840; found: 277.0848

**2-Oxo-2-phenylethyl 4-bromobenzoate (4t) :** Yield: 78%, colorless solid, Mp: 84-85°C; **IR** (Nujol,  $\text{cm}^{-1}$ ): 766, 1012, 1126, 1327, 1588, 1643, 1711, 1732, 2923, 2956;  **$^1\text{H}$  NMR** (200 MHz,  $\text{CDCl}_3$ ):  $\delta$  5.57 (s, 2H), 7.44 - 7.64 (m, 5H), 7.94 - 8.03 (m, 4 H);  **$^{13}\text{C}$  NMR** (50 MHz,  $\text{CDCl}_3$ ):  $\delta$  66.4, 127.7, 128.3, 128.4, 128.8, 131.4, 131.7, 133.8, 134.1, 165.0, 191.4; **HRMS (ESI):**  $[\text{M}+\text{Na}]^+$  calcd for  $\text{C}_{15}\text{H}_{11}\text{BrO}_3+\text{Na}$ : 340.9789; found: 340.9799

**2-Oxo-2-phenylethyl 4-chlorobenzoate (4u):** Yield: 75%, colorless solid, Mp: 127-128 °C ; **IR** (Nujol,  $\text{cm}^{-1}$ ): 753, 1091, 1226, 1273, 1376, 1456, 1595, 1697, 1726, 2724, 2857, 2926;  **$^1\text{H}$  NMR** (500 MHz,  $\text{CDCl}_3$ ):  $\delta$  5.58 (s, 2H) 7.44- 7.56 (m, 5H), 7.97(d,  $J = 7.3\text{Hz}$ , 2H) 8.07 – 8.11 (d,  $J = 7.3 \text{ Hz}$ , 2H);  **$^{13}\text{C}$  NMR** (125 MHz,  $\text{CDCl}_3$ ):  $\delta$  66.5, 77.0, 127.8, 128.6, 128.8, 128.9, 131.3, 133.9, 134.2, 139.8, 165.0, 191.6; **HRMS (ESI):**  $[\text{M}+\text{Na}]^+$  calcd for  $\text{C}_{15}\text{H}_{11}\text{ClO}_3+\text{Na}$ : 297.0294; found: 297.0294.

**2-Oxo-2-phenylethyl nicotinate (4v):** Yield: 73%, colorless solid, Mp: 64-65 °C: **IR** ( $\text{CHCl}_3$ ,  $\text{cm}^{-1}$ ): 753, 1076, 1342, 1463, 1591, 1650, 1695, 1726, 2854, 2870, 2923;  **$^1\text{H}$  NMR** (400 MHz,  $\text{CDCl}_3$ ):  $\delta$  5.61 (s, 2H), 7.44 (dd,  $J = 7.6, 4.9 \text{ Hz}$ , 1H) 7.50 - 7.54 (m, 2H), 7.62 - 7.64 (m, 1H), 7.97 (d,  $J = 7.5 \text{ Hz}$ , 2H), 8.40 (d,  $J = 7.7 \text{ Hz}$ , 1H), 8.82 (br. s, 1H), 9.33 (br. s, 1H);  **$^{13}\text{C}$  NMR**



(100 MHz, CDCl<sub>3</sub>) δ 66.6, 123.3, 125.6, 127.8, 128.9, 134.0, 134.1, 137.4, 151.2, 153.7, 164.6, 191.1; **HRMS (ESI):** [M+Na]<sup>+</sup> calcd for C<sub>14</sub>H<sub>11</sub>NO<sub>3</sub>+Na: 264.0637; found: 264.0648.

**2, 3-Epoxy-1-(4-nitrophenyl)-3-phenylpropan-1-one (5):** Yield: 56%, colorless solid, Mp: 120-121 °C; **IR** (CHCl<sub>3</sub>, cm<sup>-1</sup>): 745, 1233, 1451, 1519, 1598, 1692, 2850, 2923; **<sup>1</sup>H NMR** (200 MHz, CDCl<sub>3</sub>); δ 4.21 (d, *J* = 1.7 Hz 1H), 4.25 (d, *J* = 1.7 Hz, 1H), 7.52 - 7.56 (m, 4H), 7.58 (m, 1H), 8.02 (d, *J* = 8.7 Hz, 2H), 8.29 (d, *J* = 8.7 Hz, 2H); **<sup>13</sup>C NMR** (100 MHz, CDCl<sub>3</sub>); δ 57.9, 60.8, 124.1, 126.6, 128.4, 129.0, 134.3, 135.2, 142.7, 148.3, 191.9; **HRMS (ESI):** [M+H]<sup>+</sup> calcd for C<sub>15</sub>H<sub>11</sub>NO<sub>4</sub>+H: 270.0766; found: 270.0777.

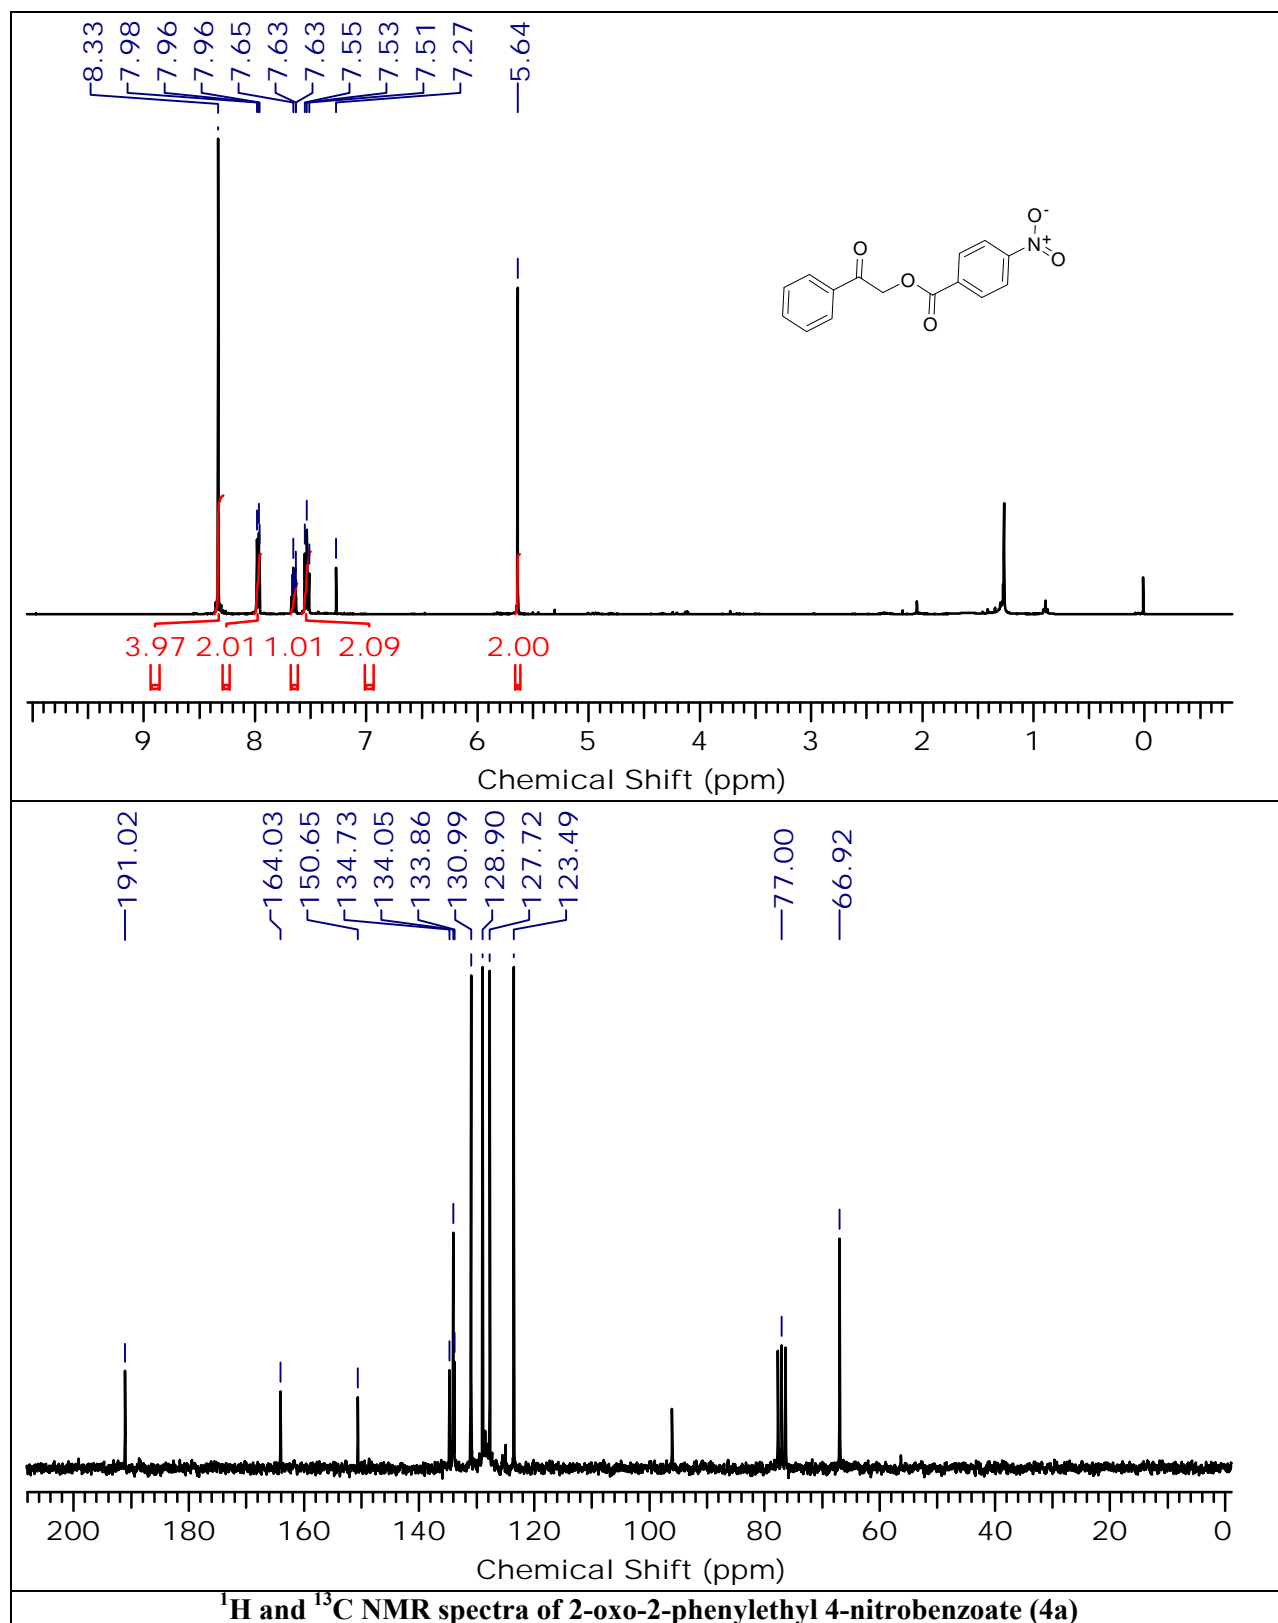

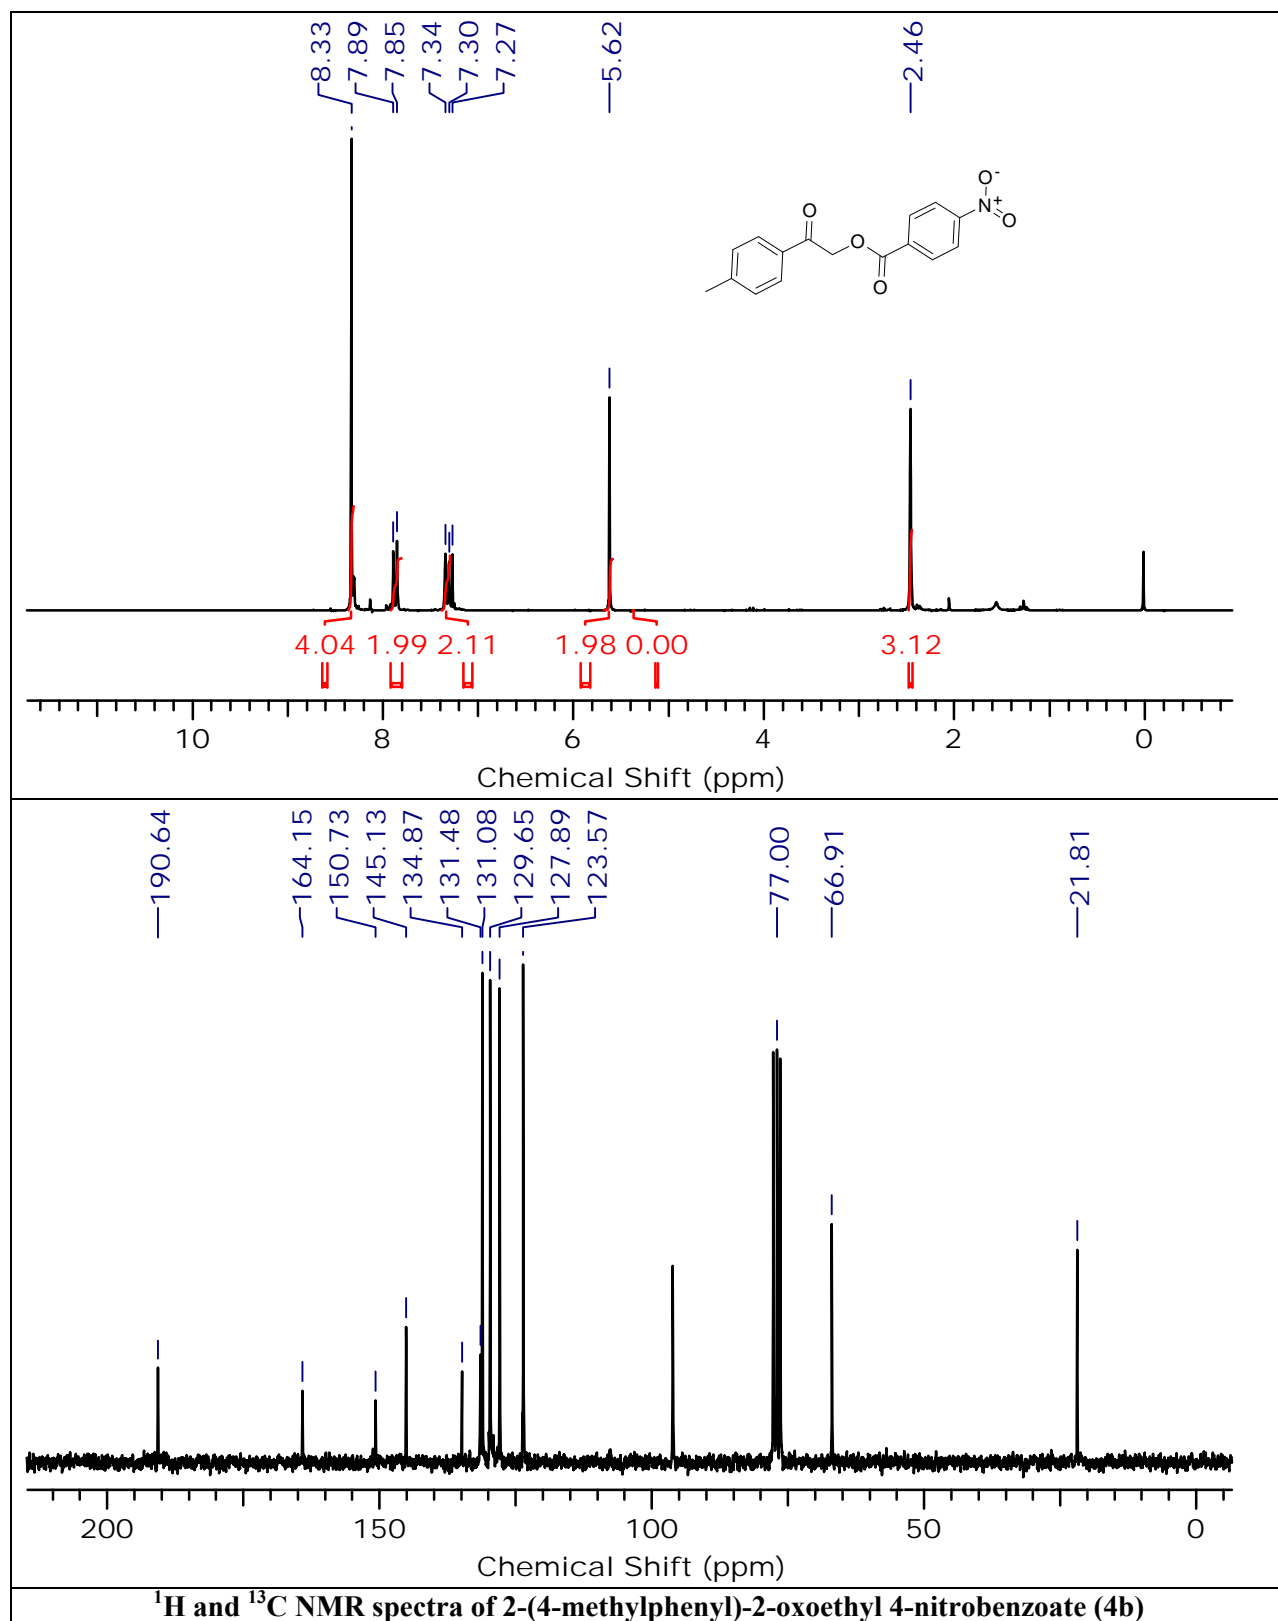

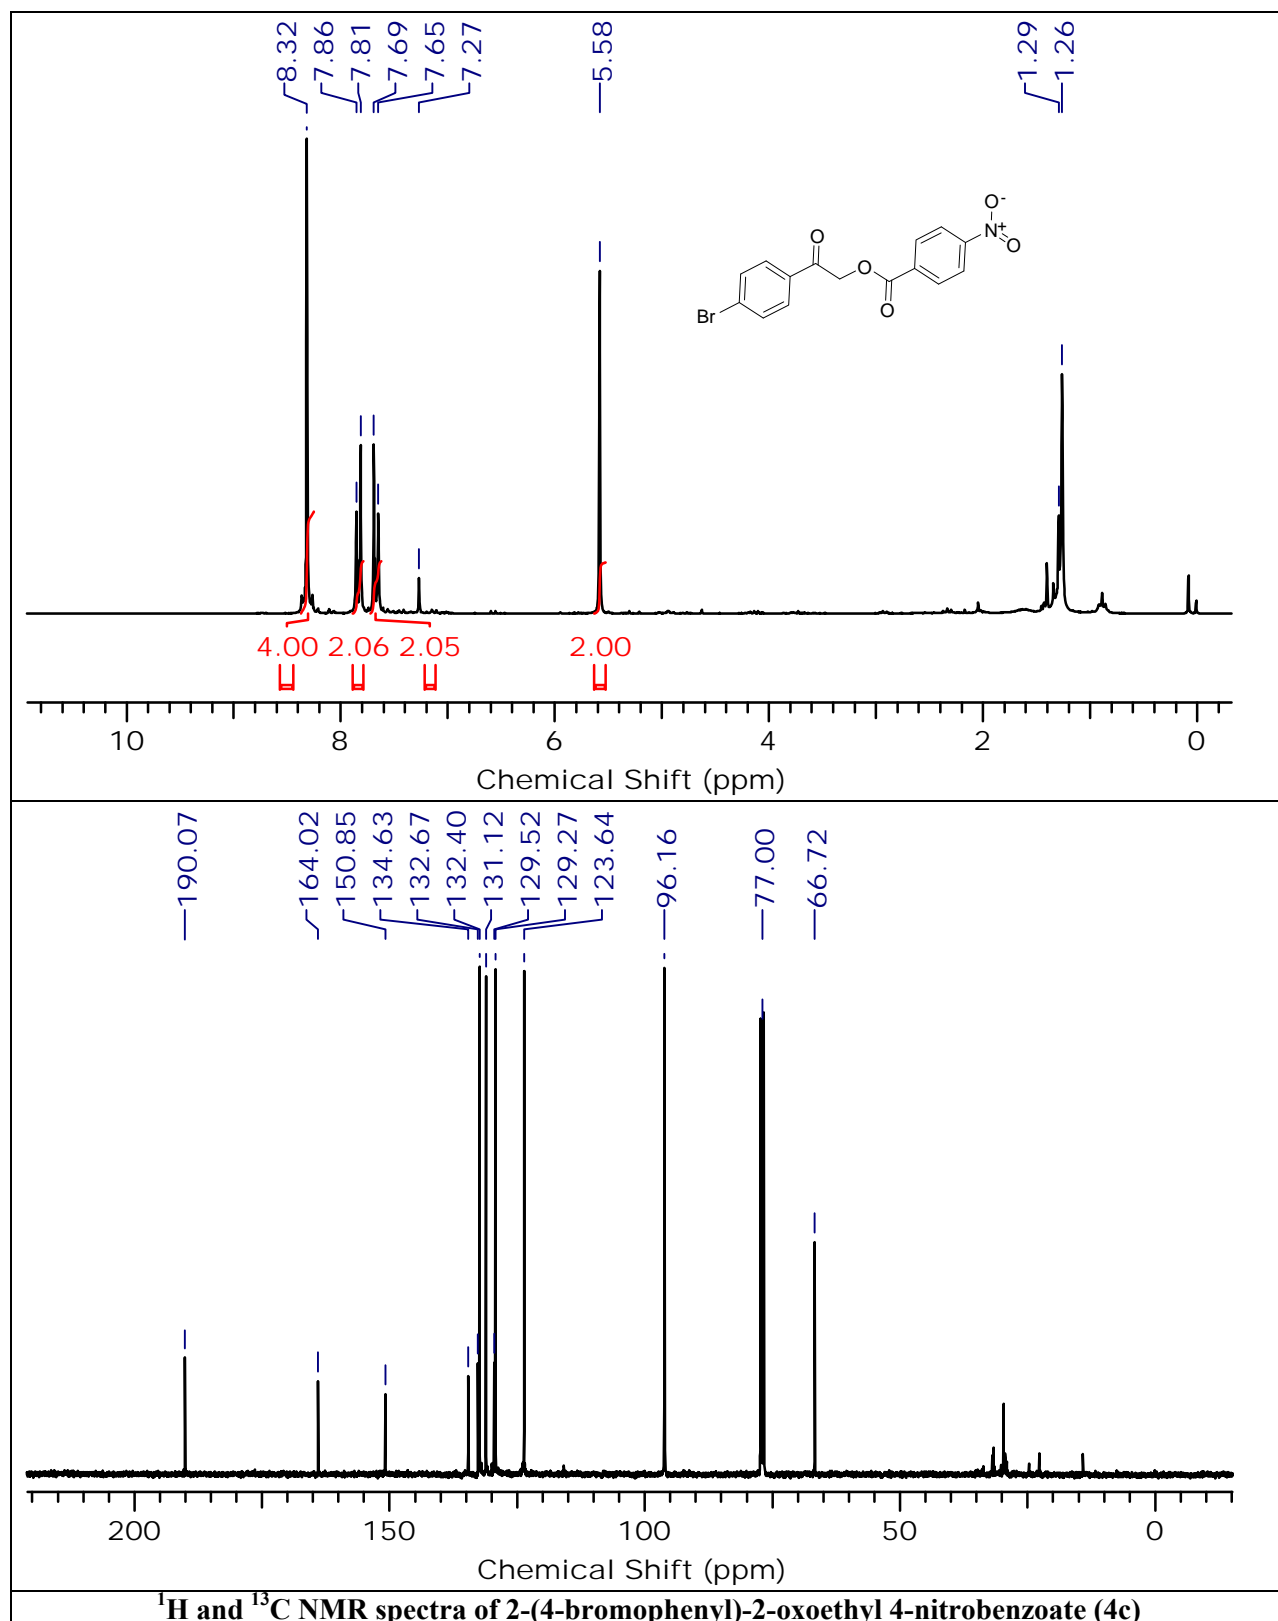

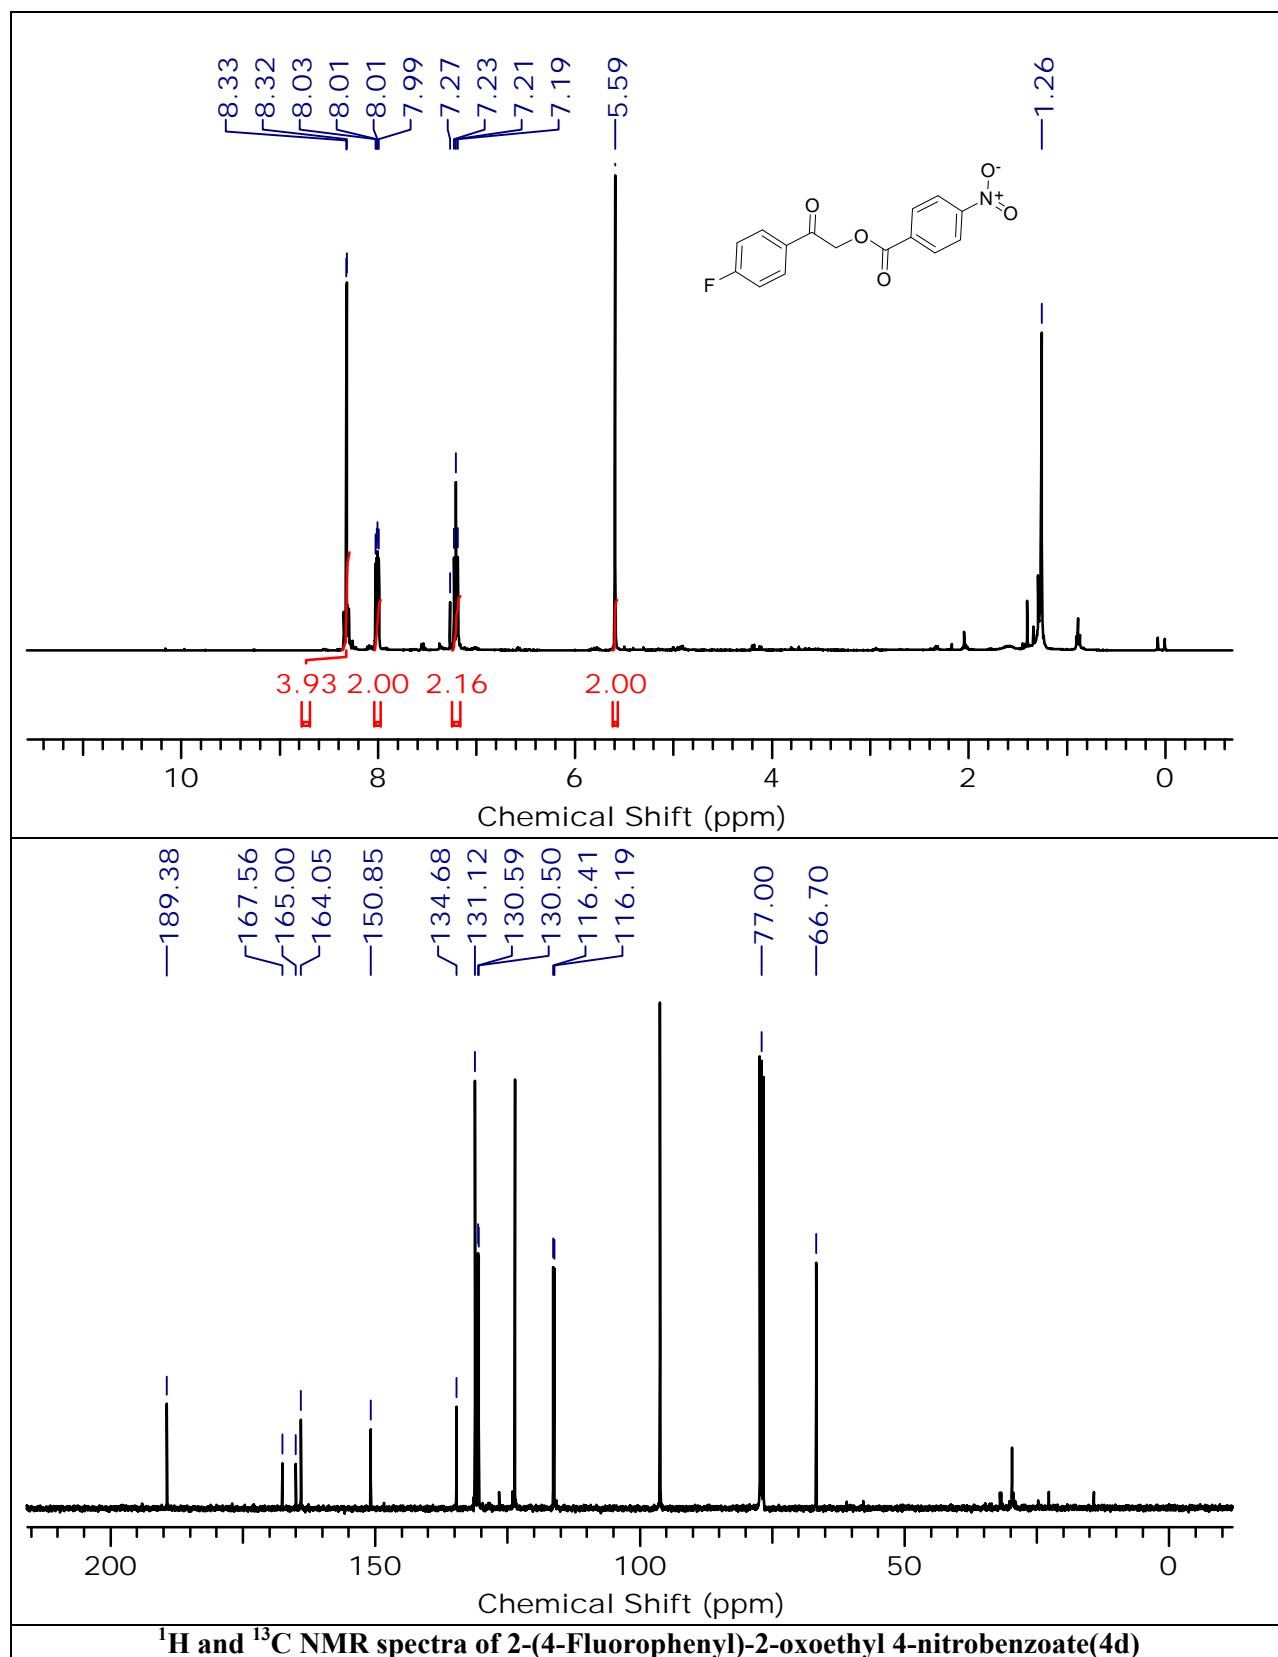

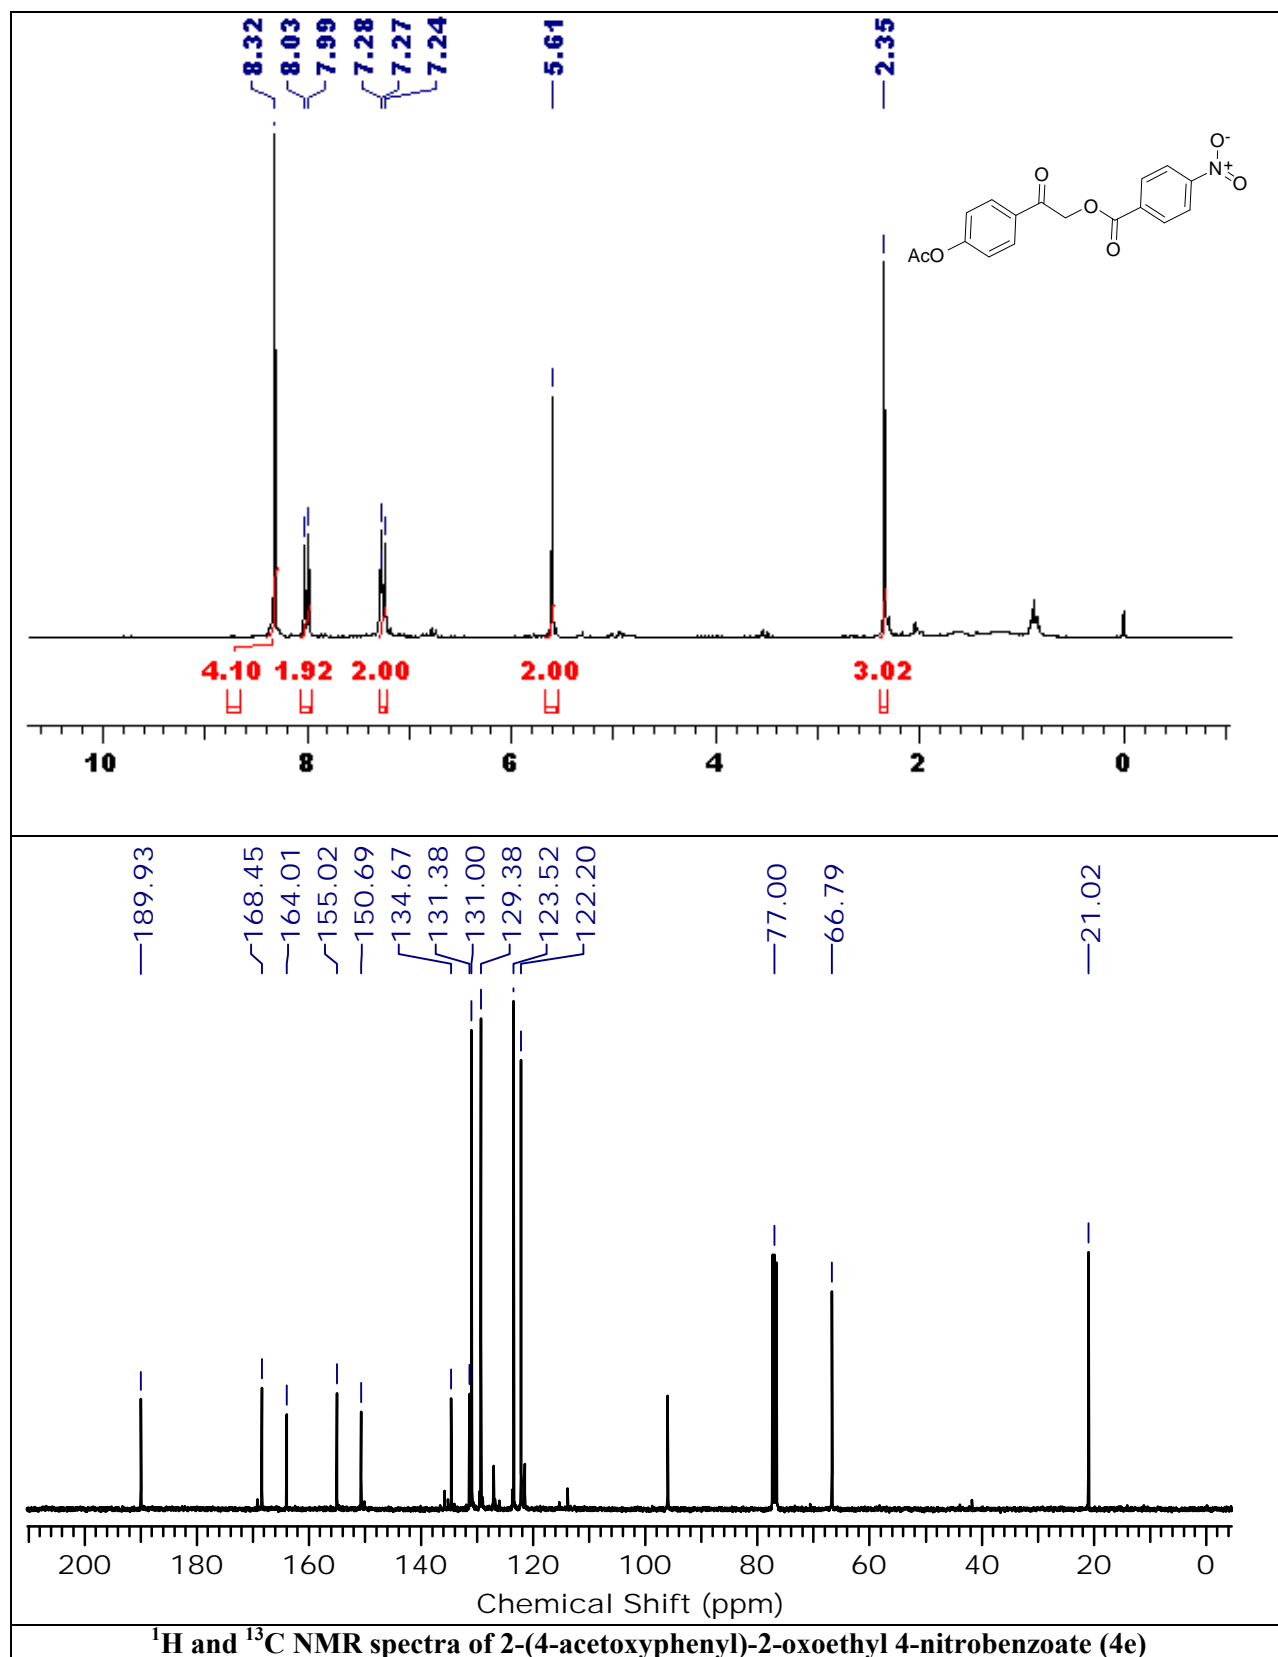

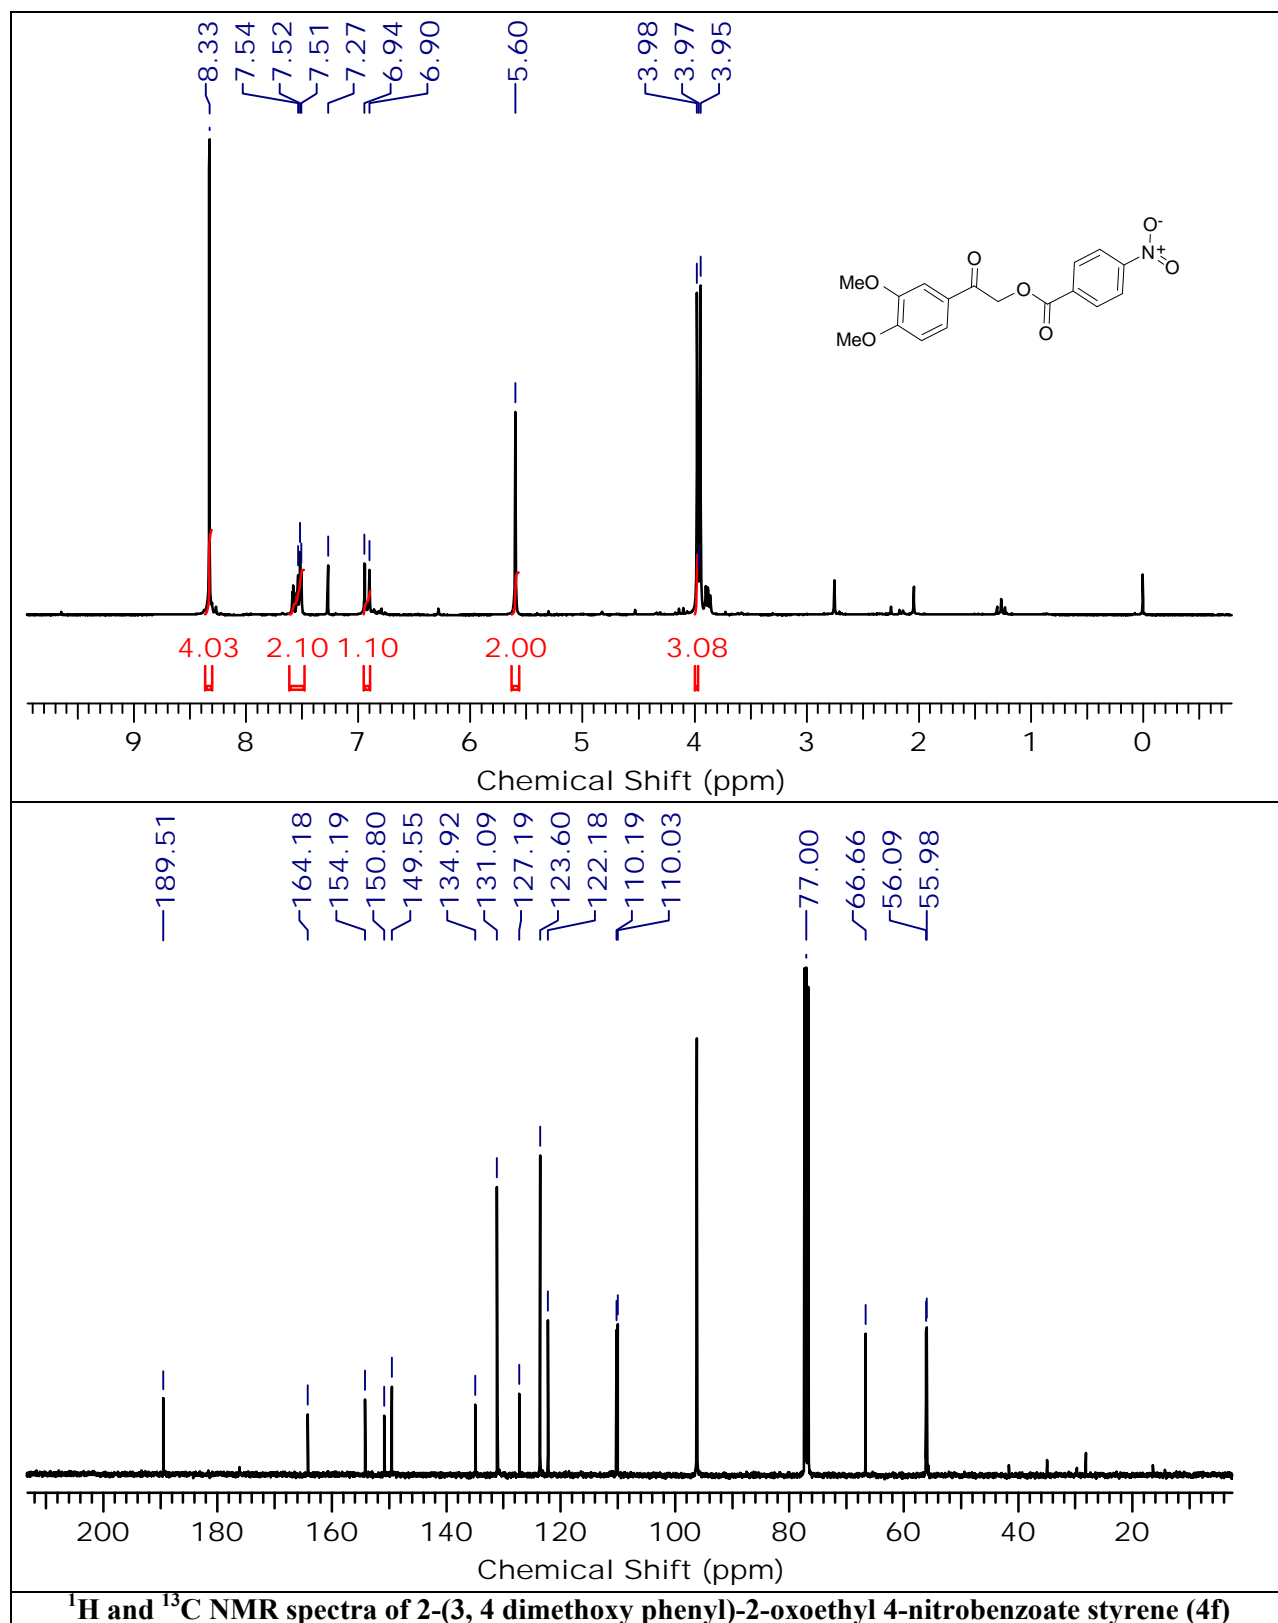

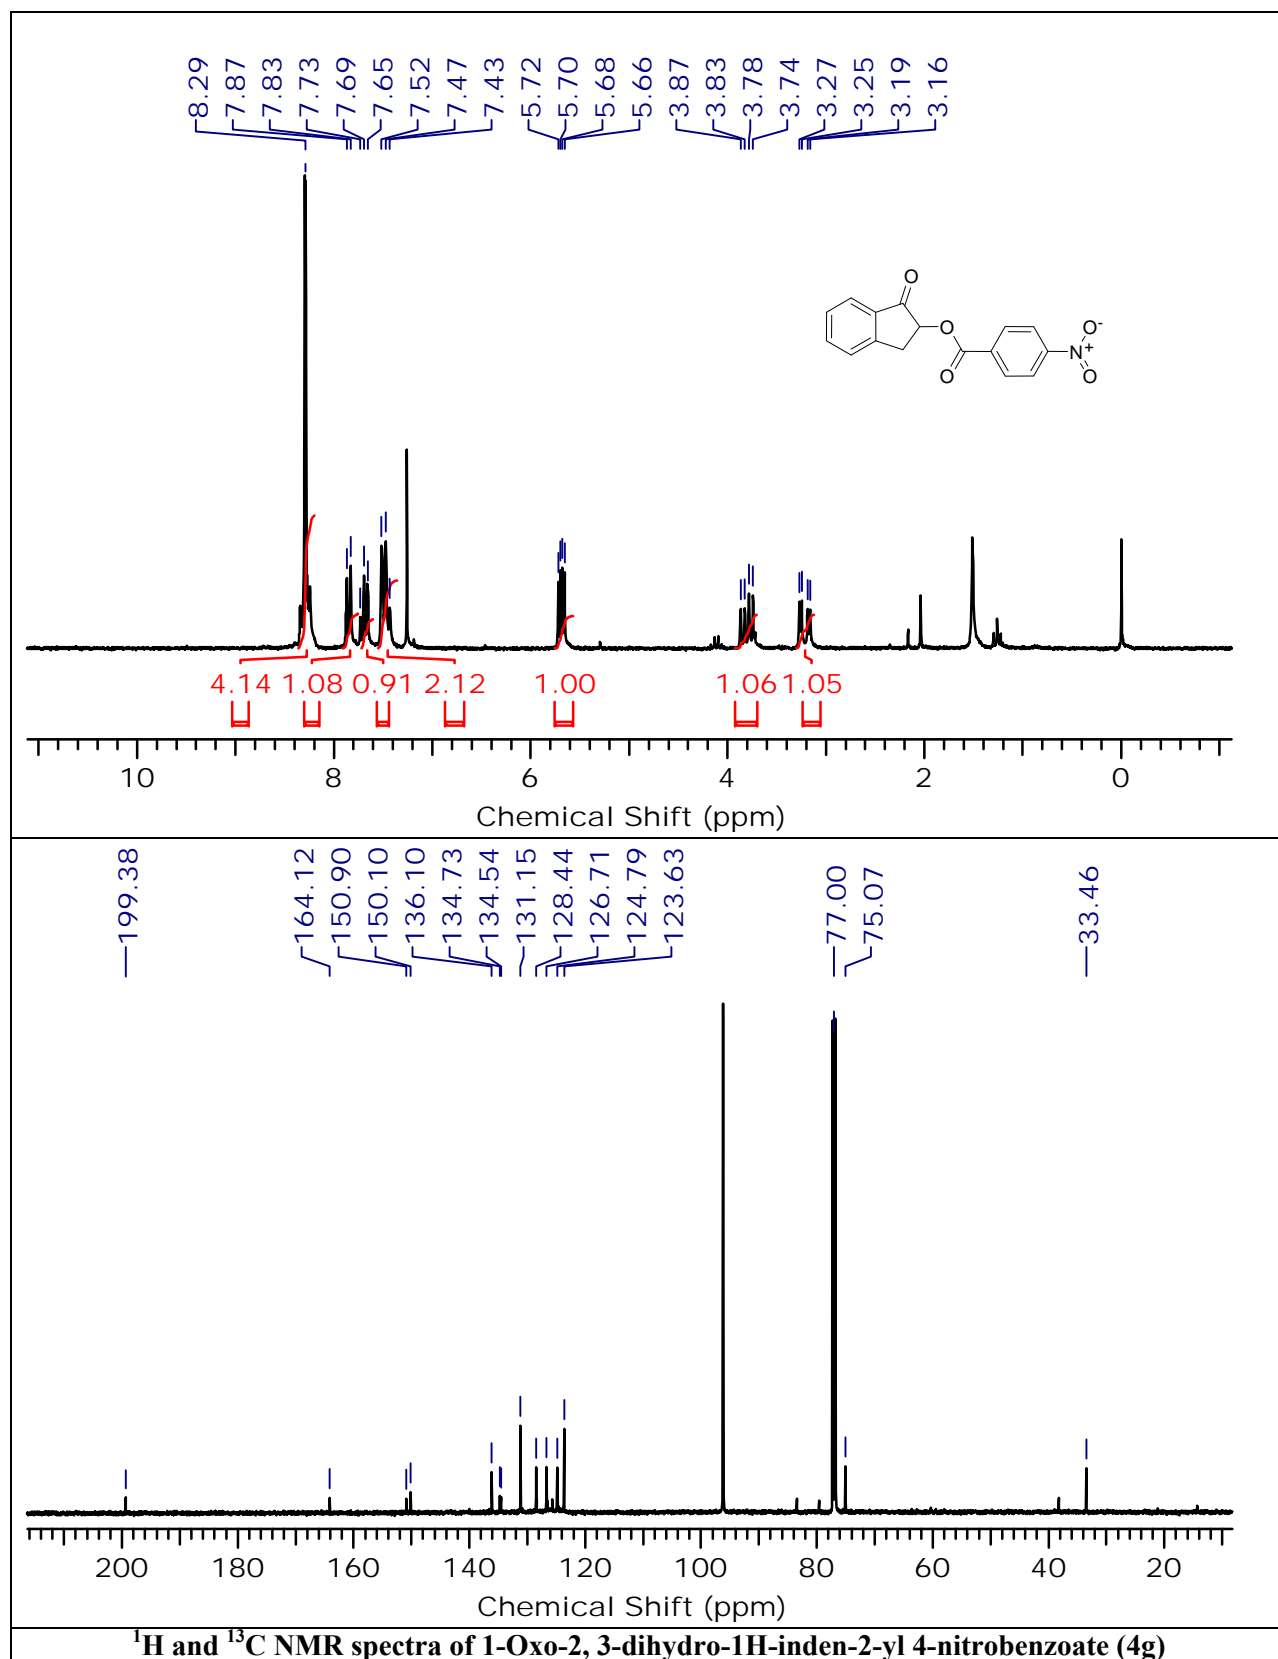



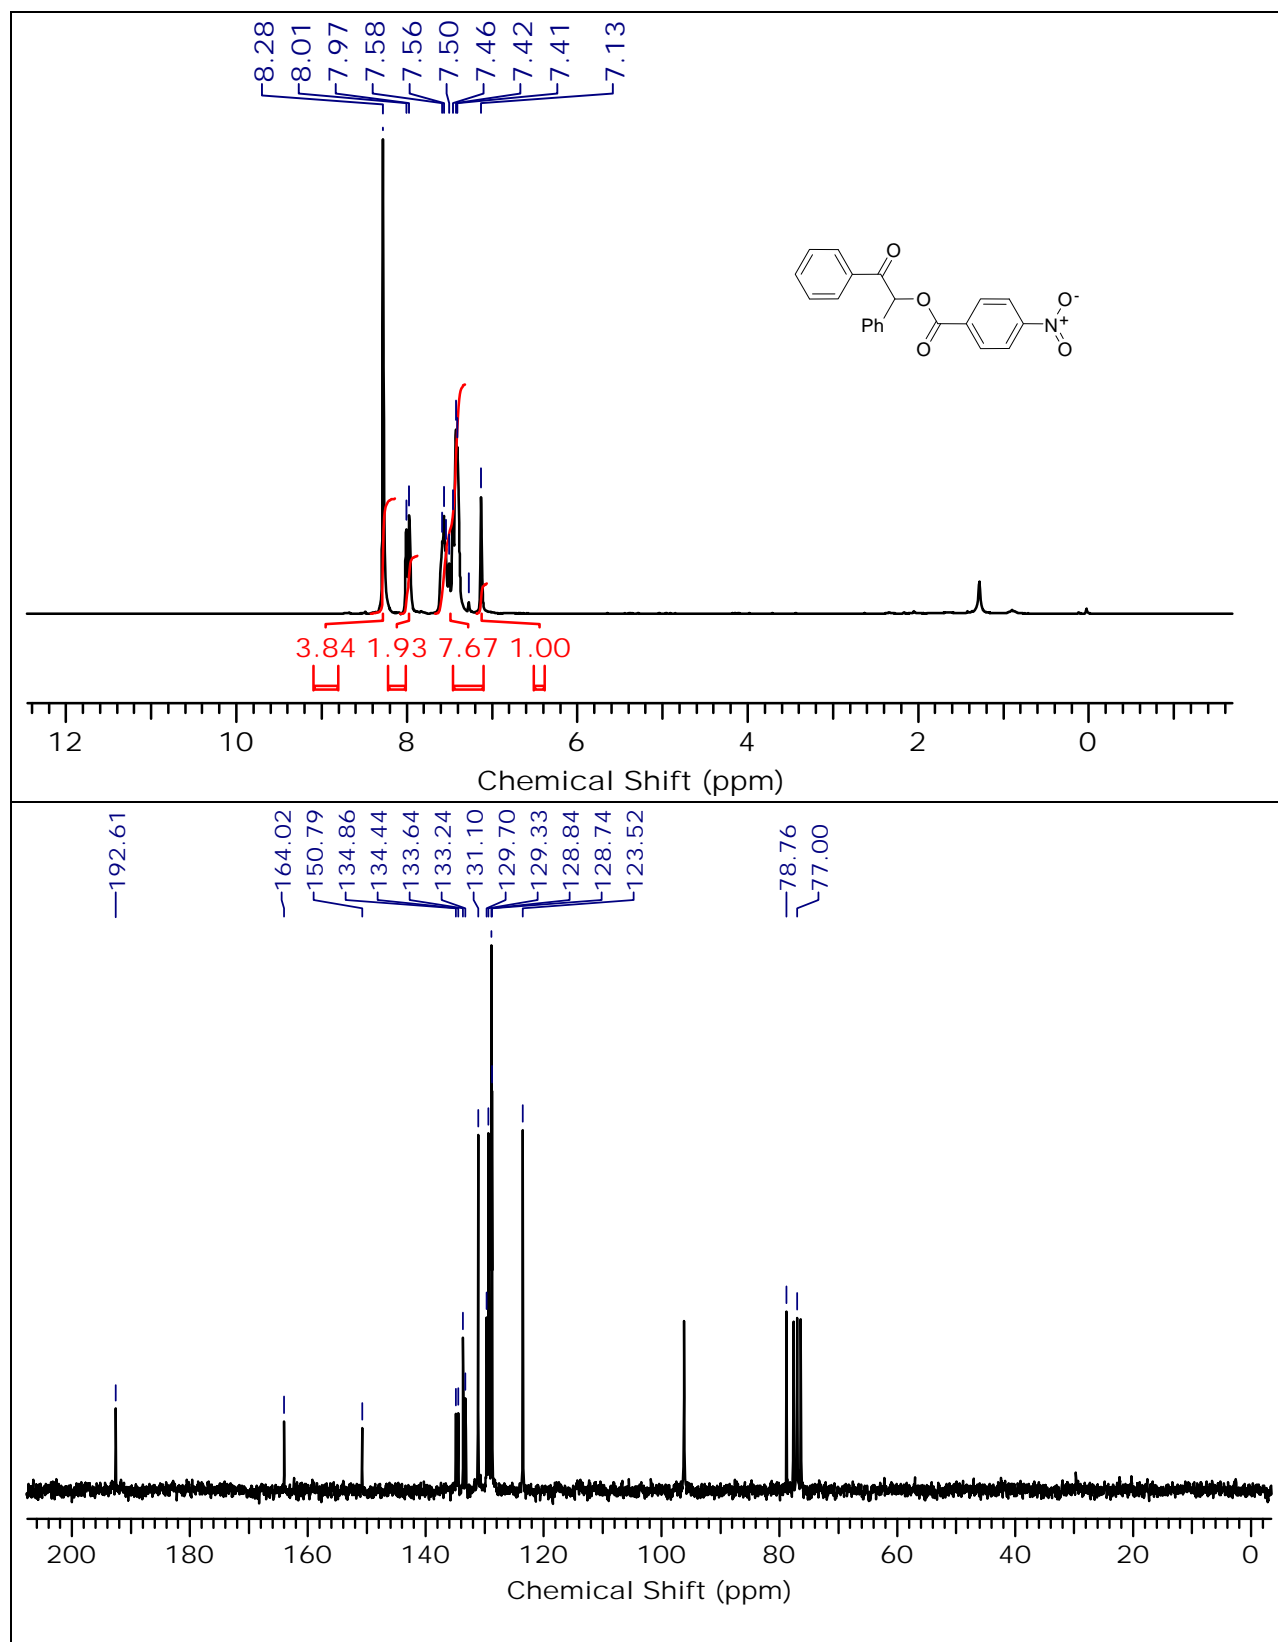

**<sup>1</sup>H and <sup>13</sup>C NMR spectra of 2-Oxo-1, 2-diphenylethyl 4-nitrobenzoate (4h)**

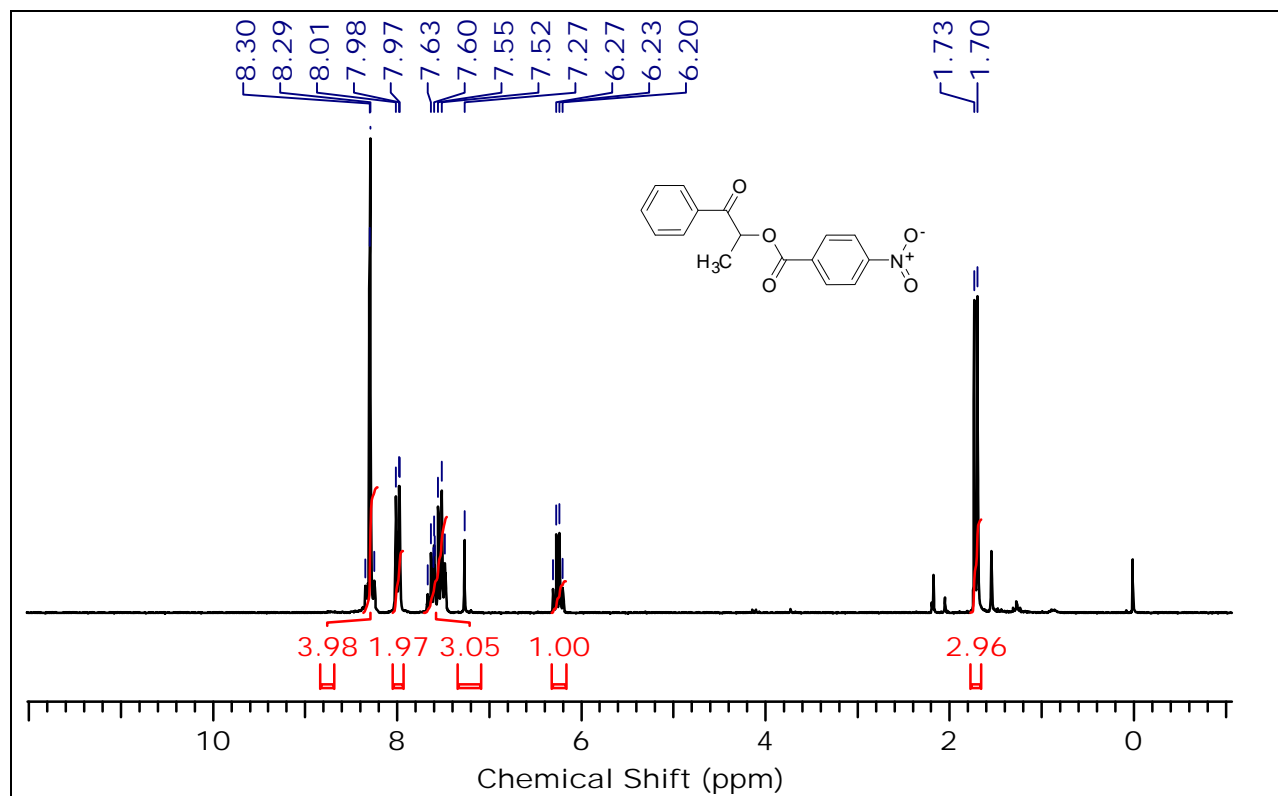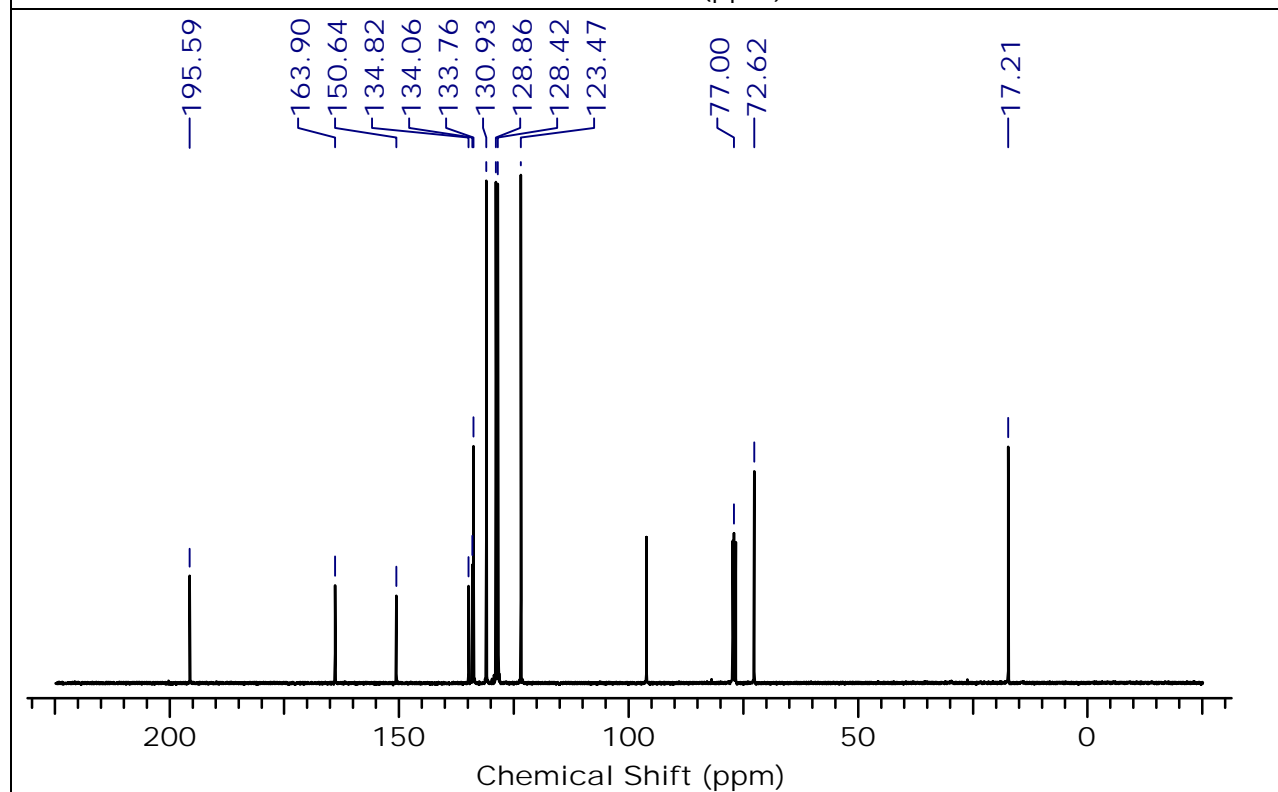

**<sup>1</sup>H and <sup>13</sup>C NMR spectra of 1-Oxo-1-phenylpropan-2-yl 4-nitrobenzoate (4i)**

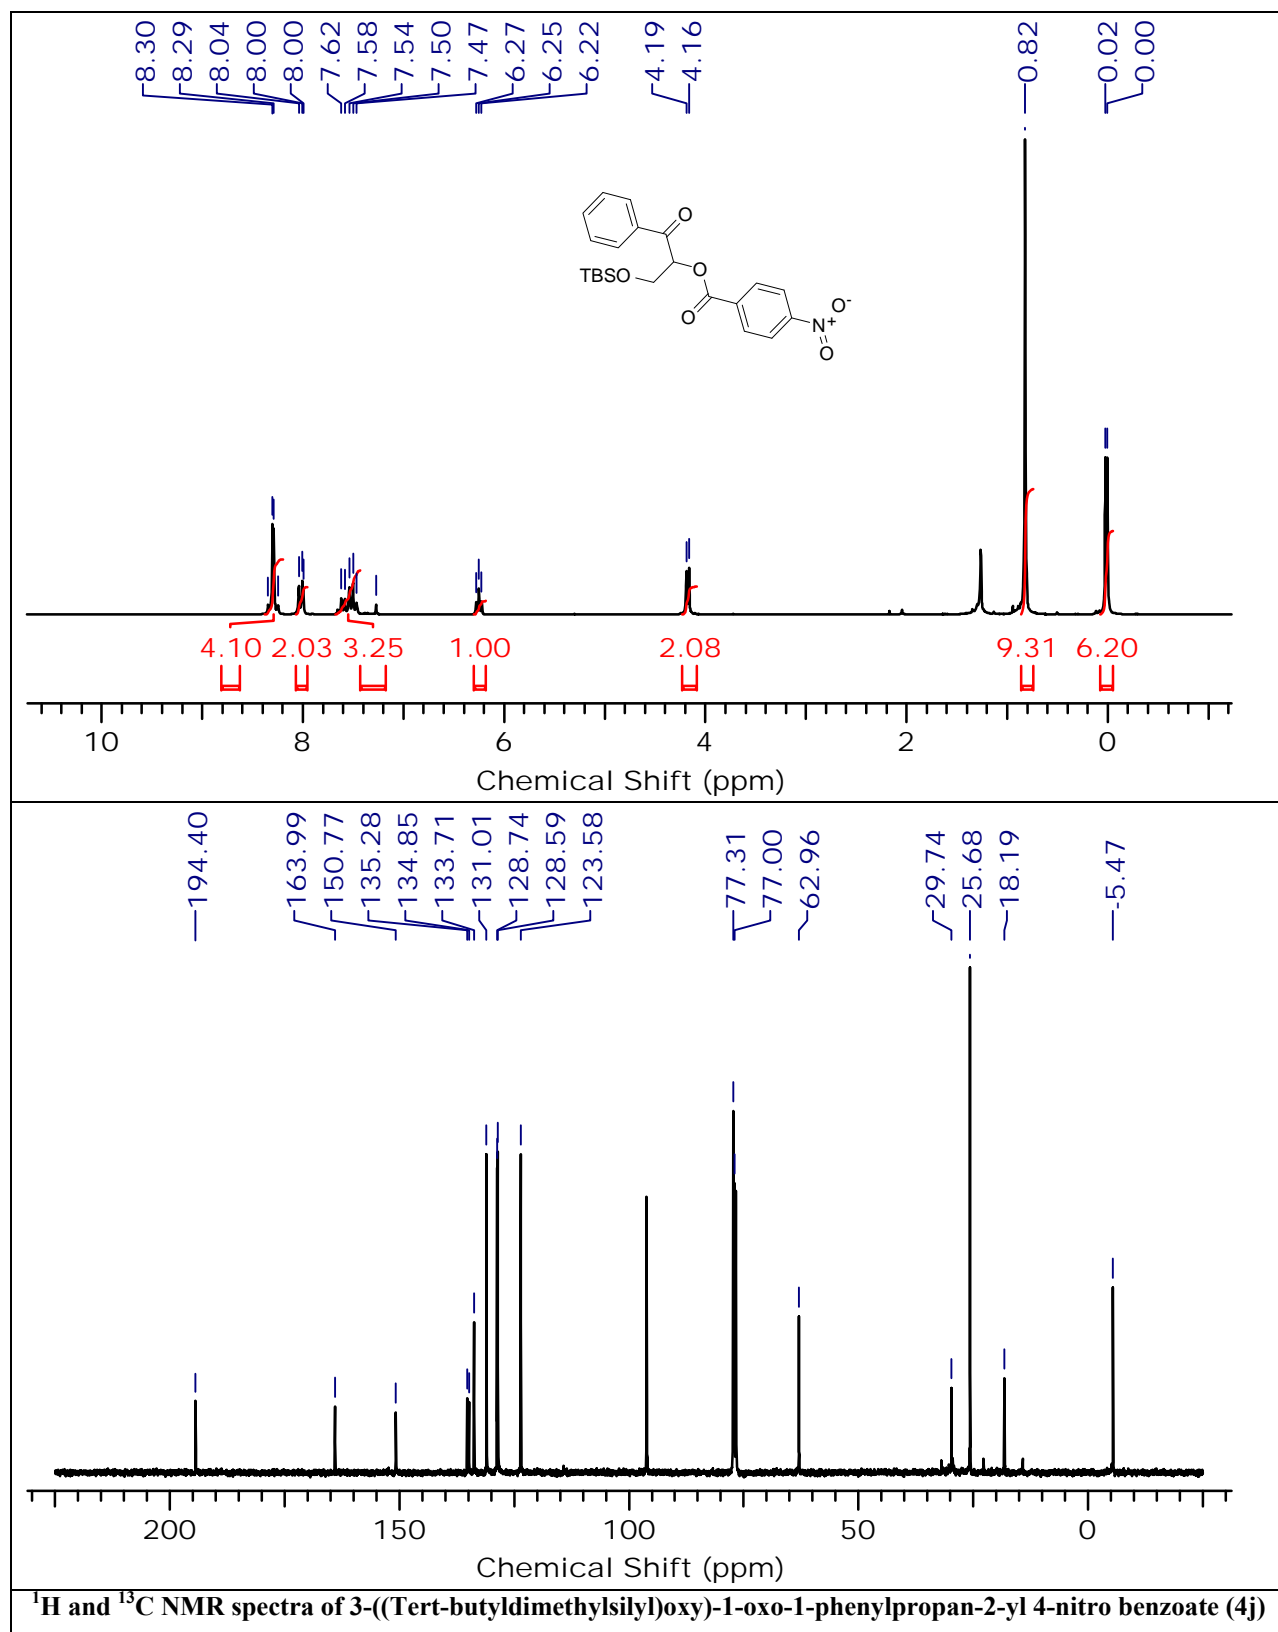

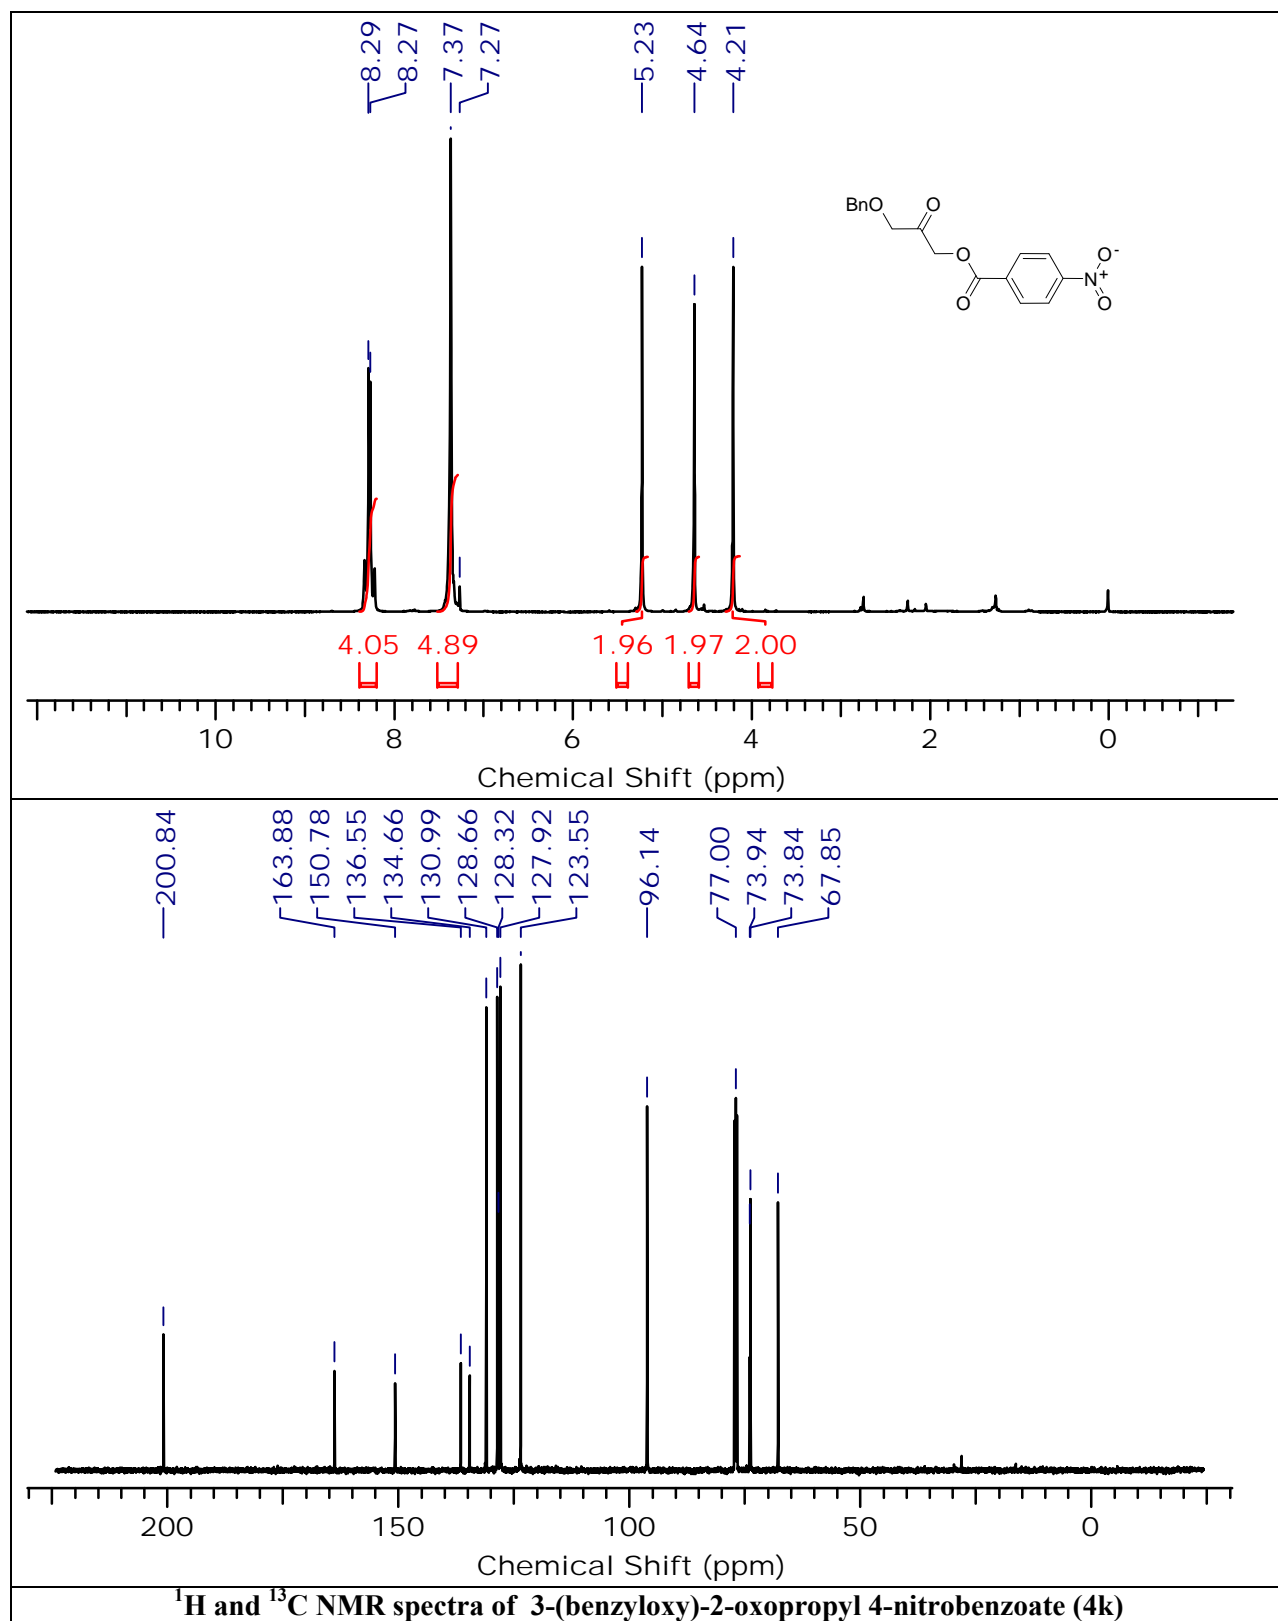

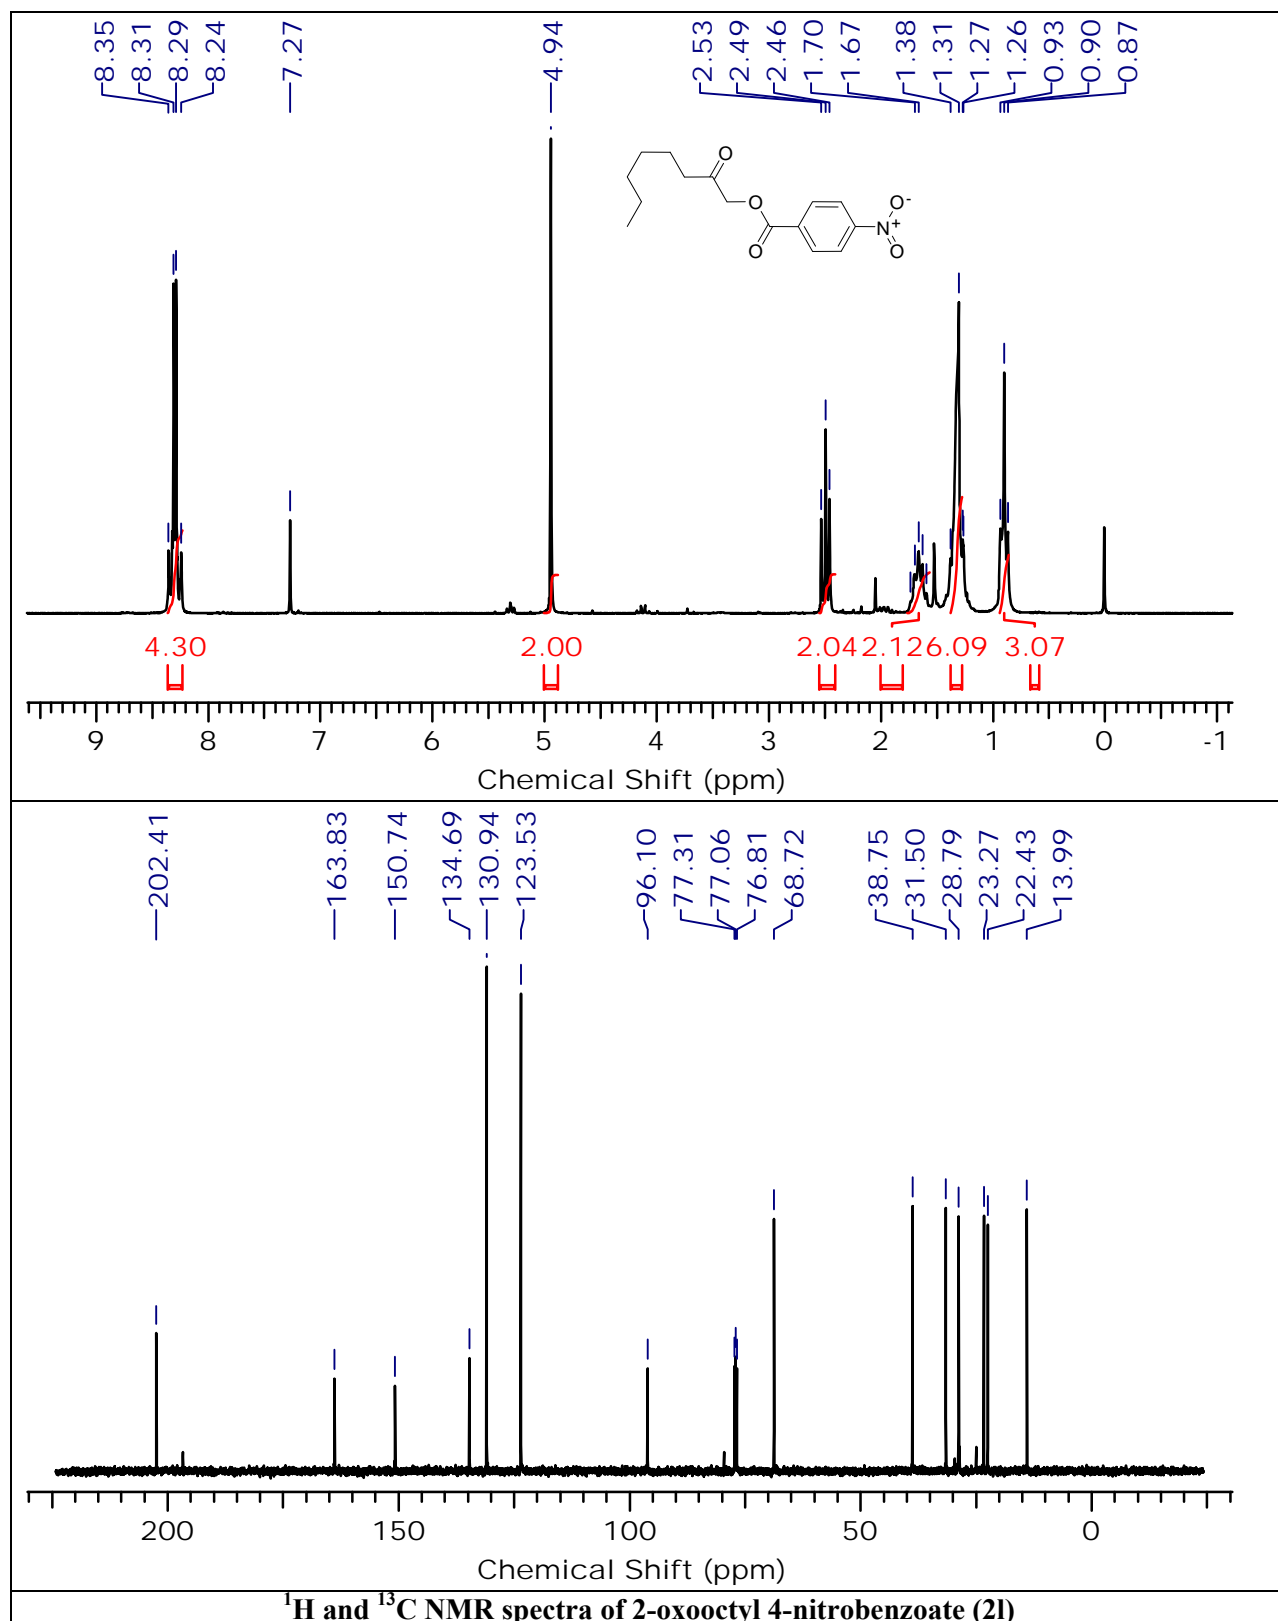

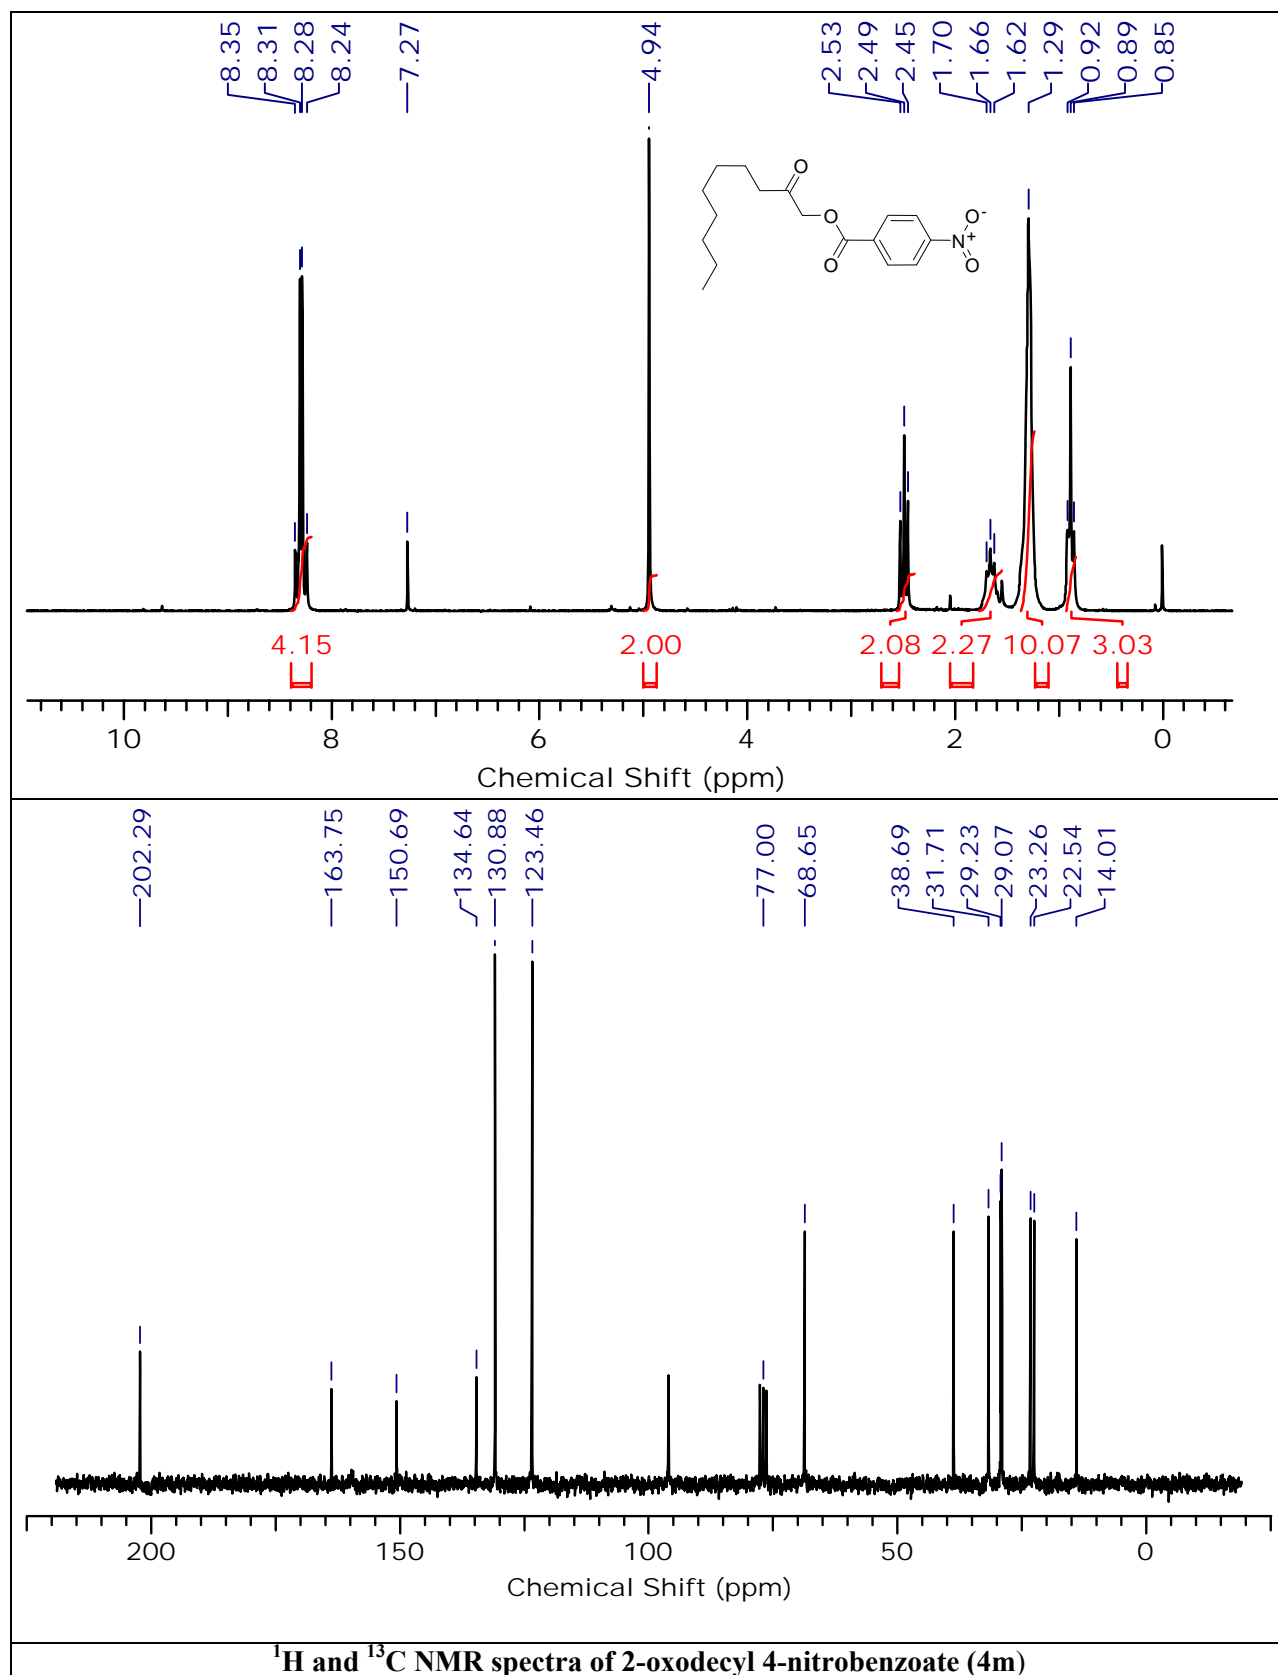

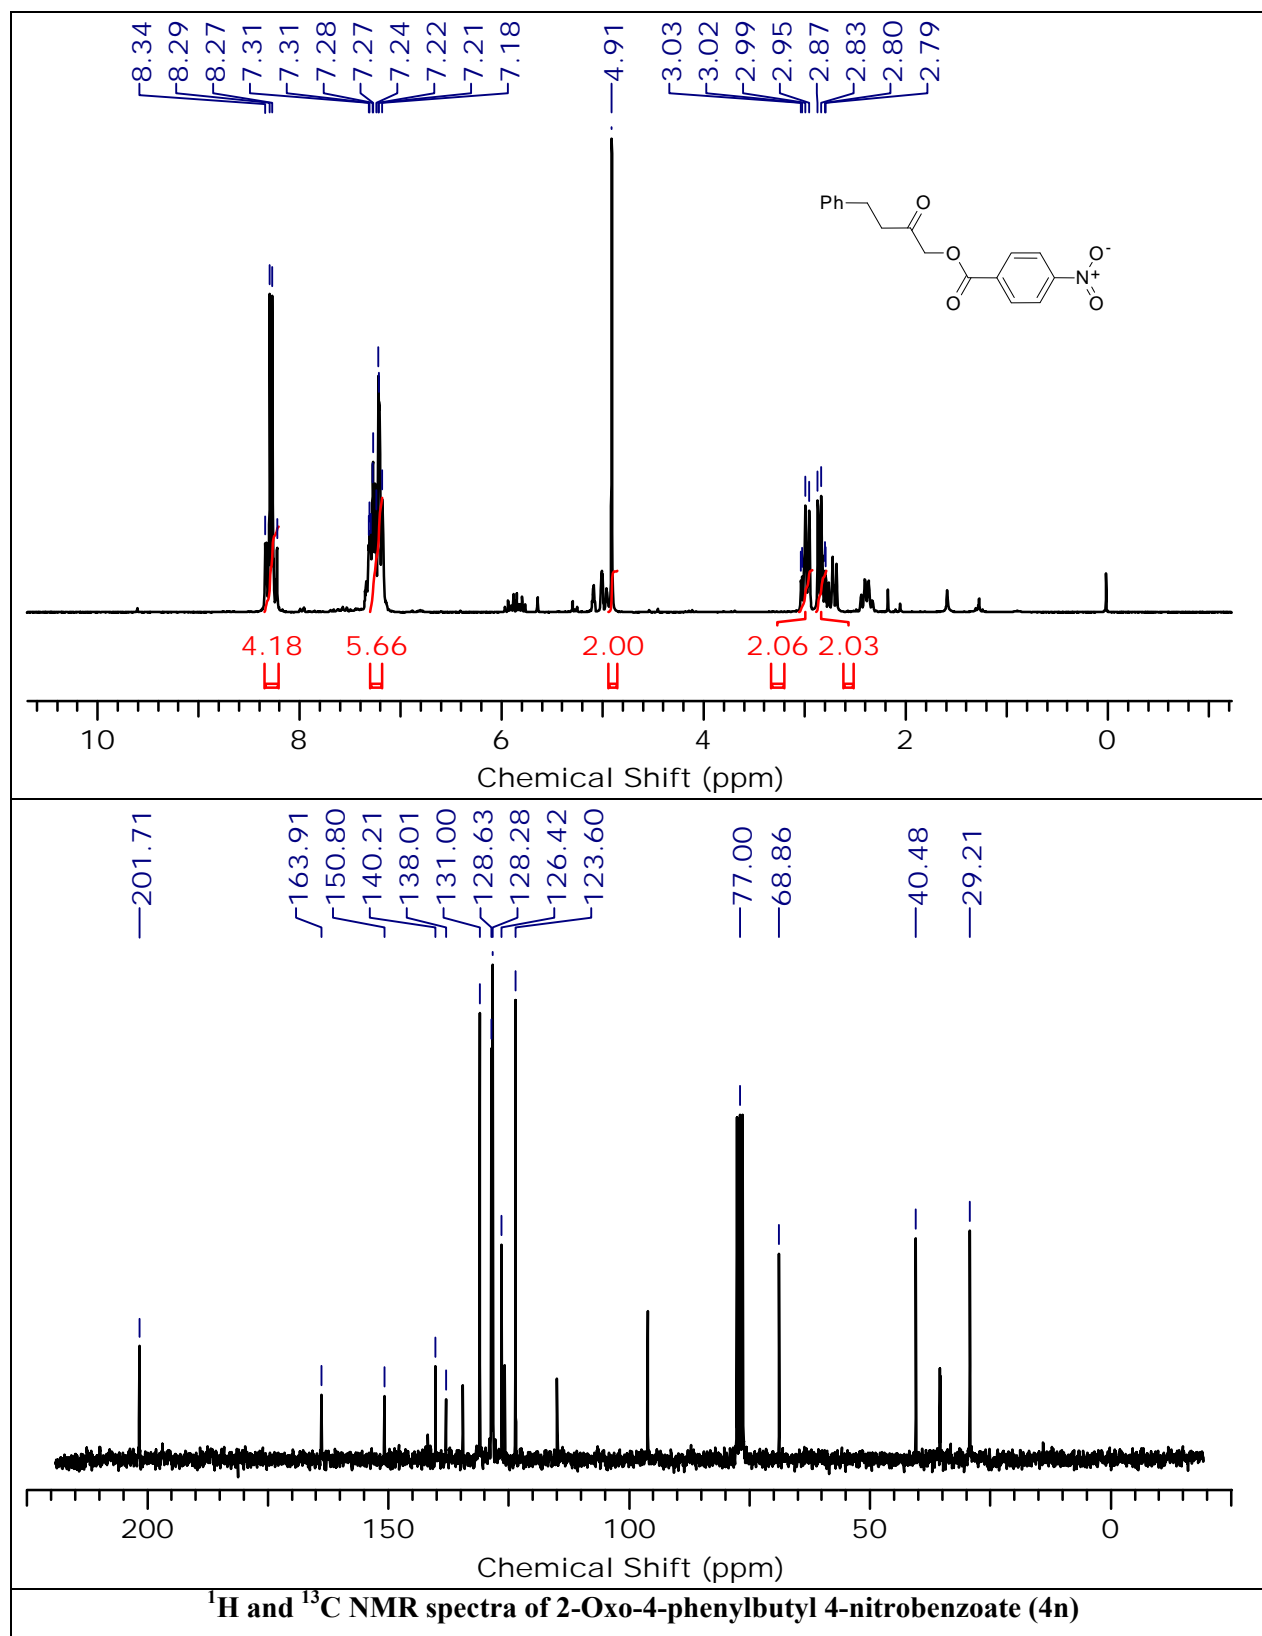

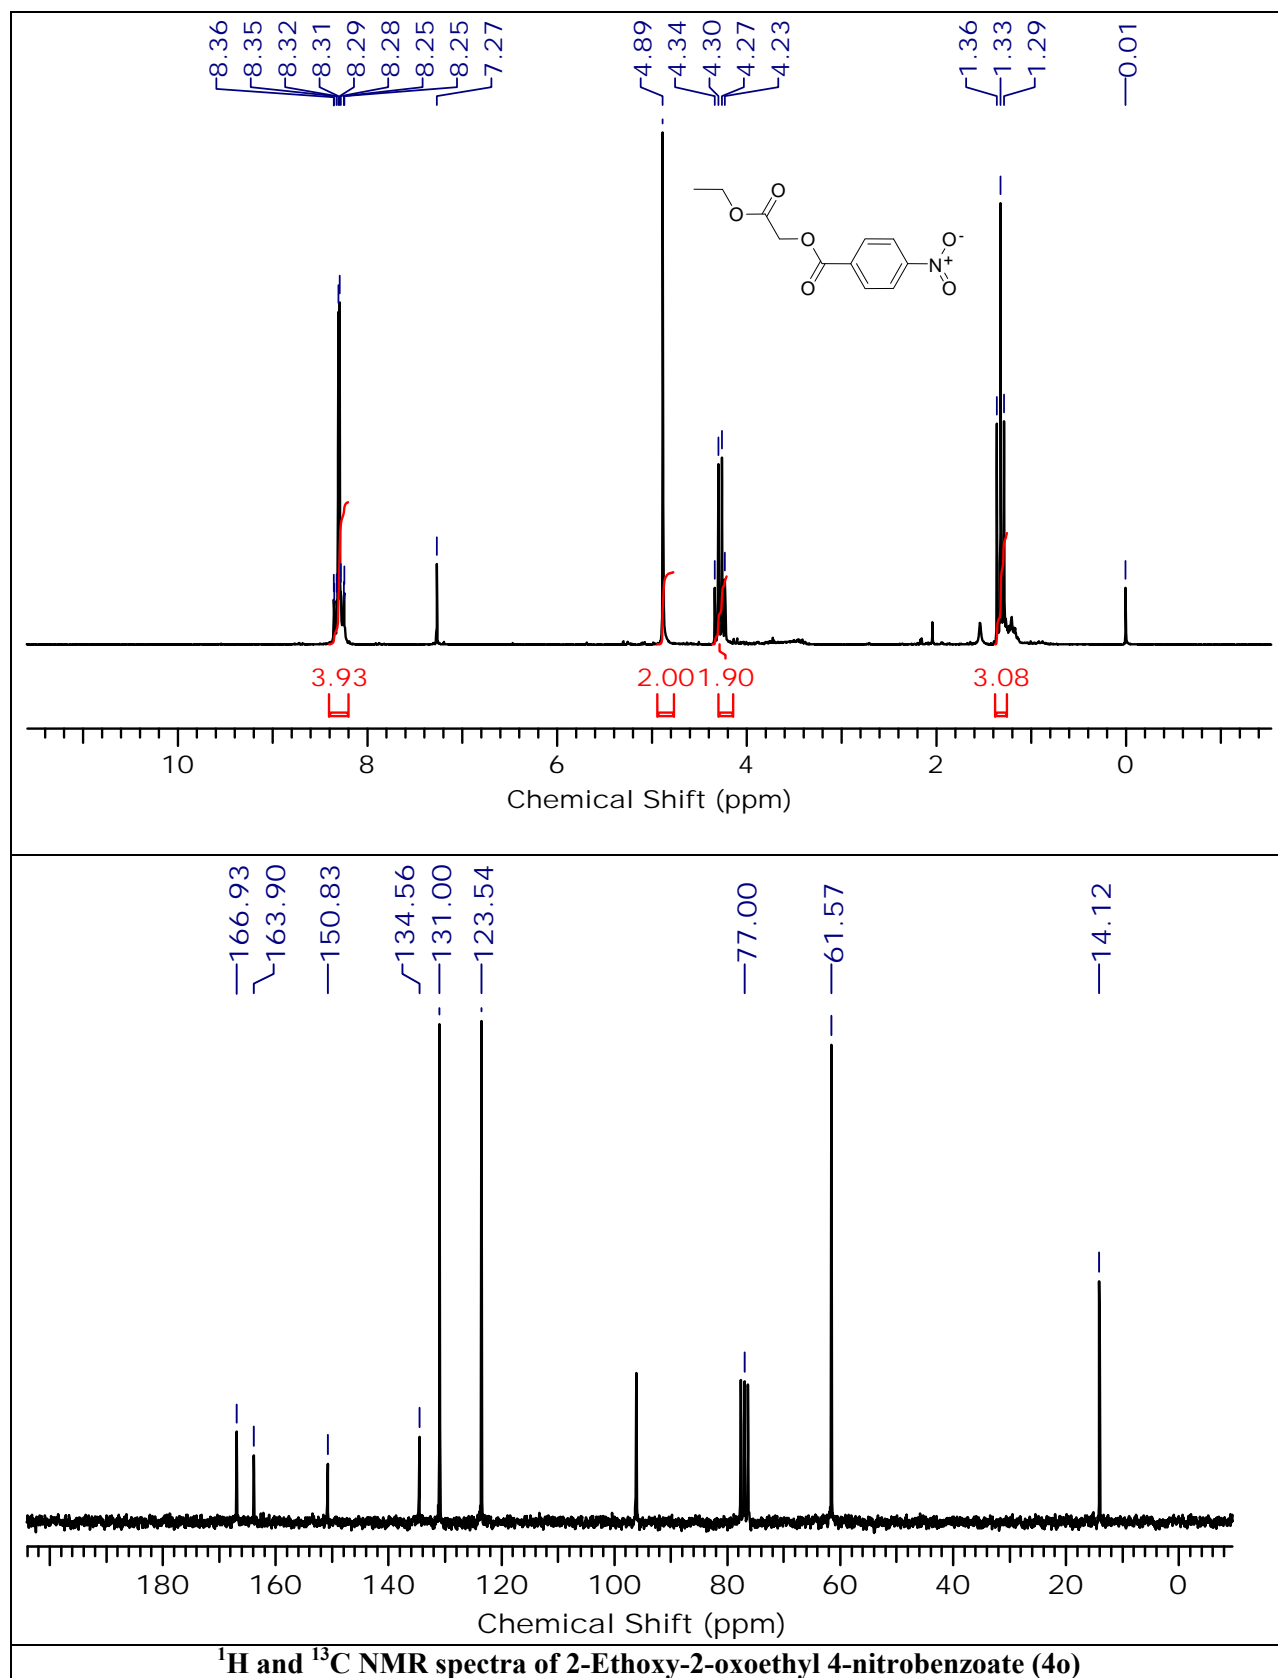



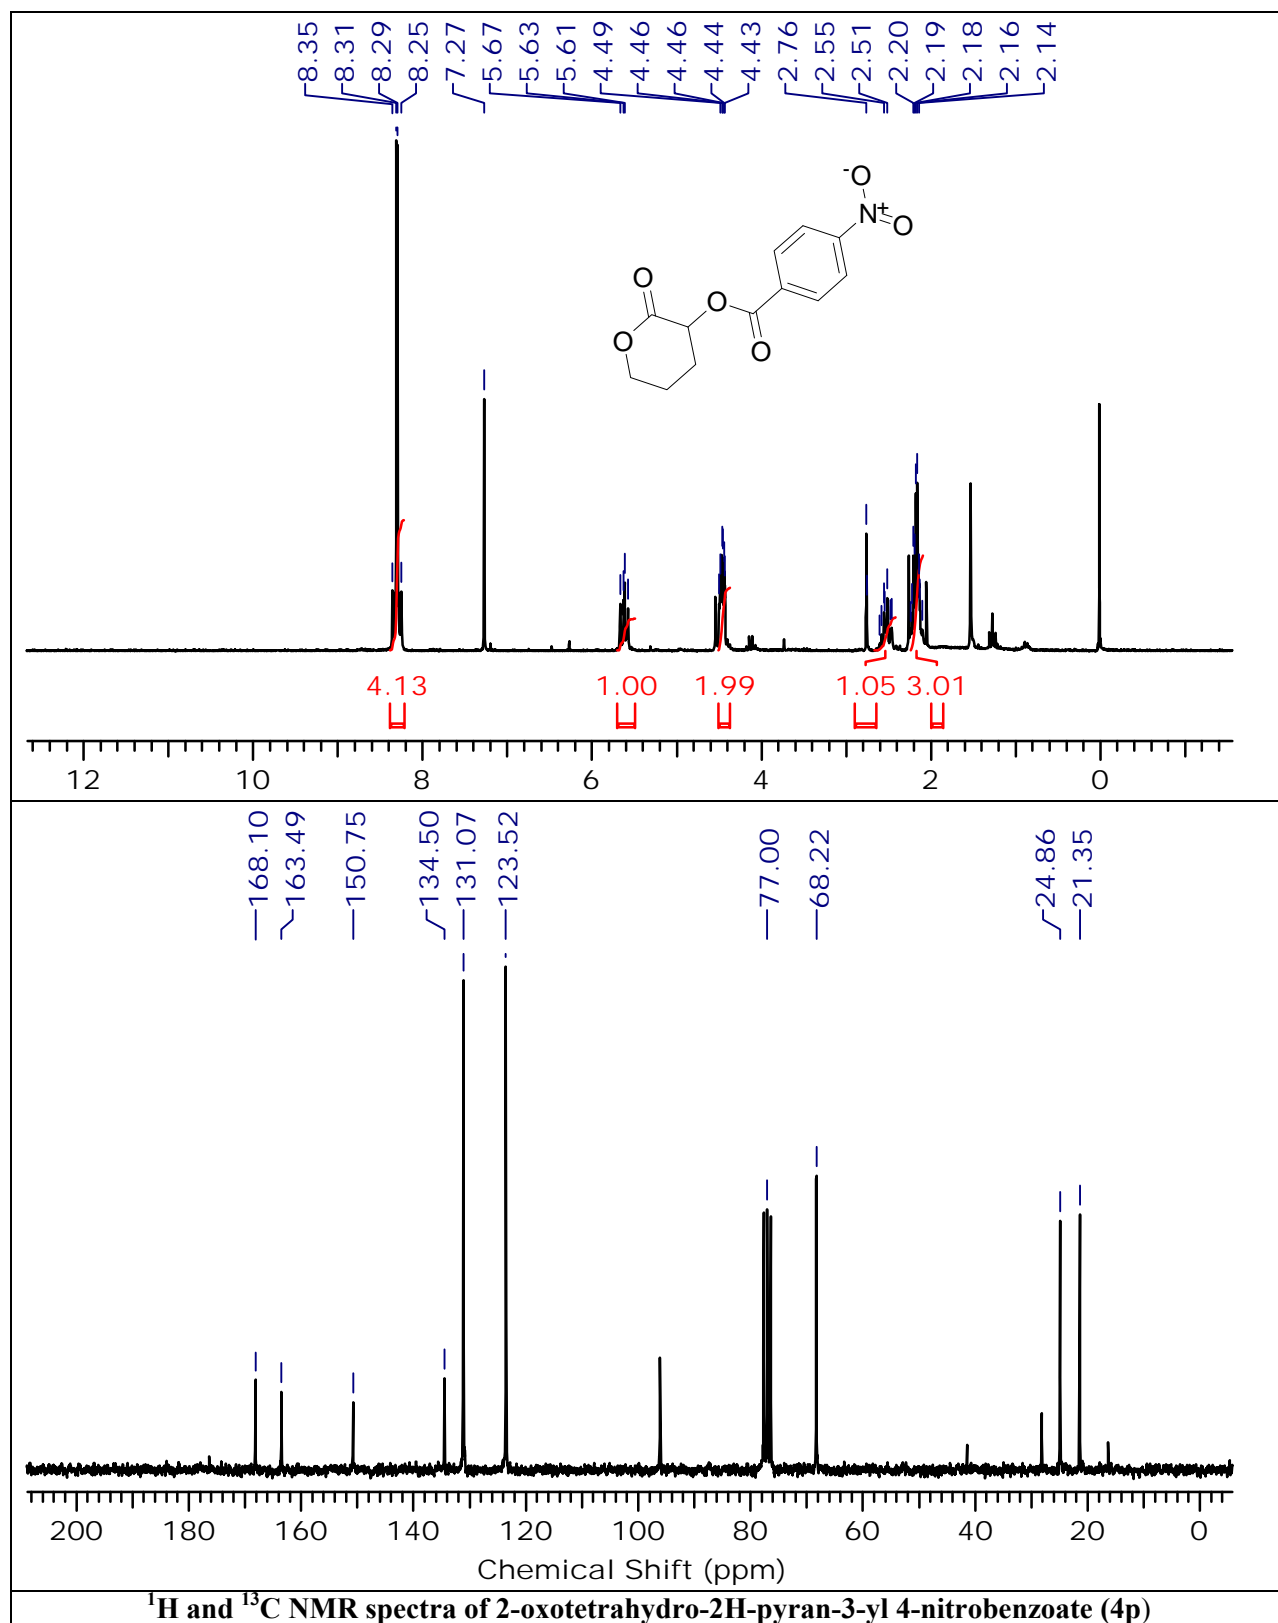

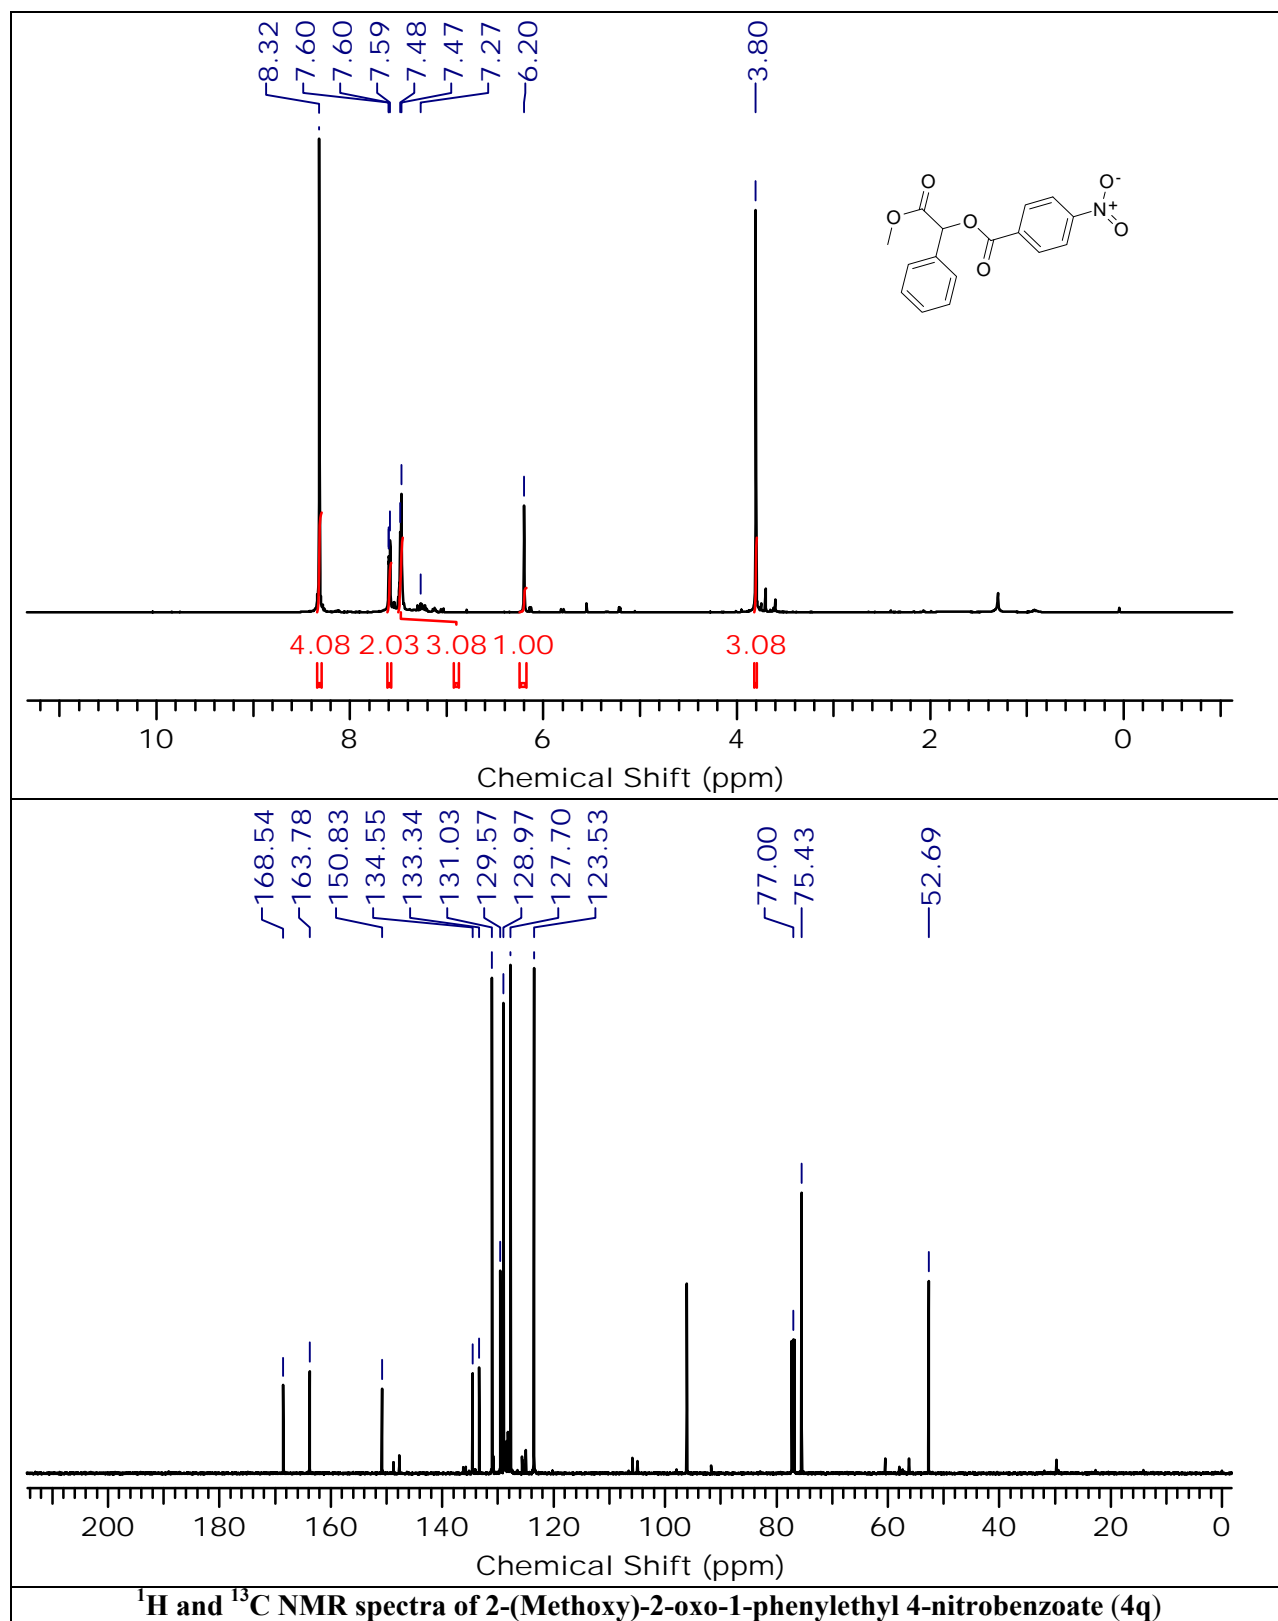

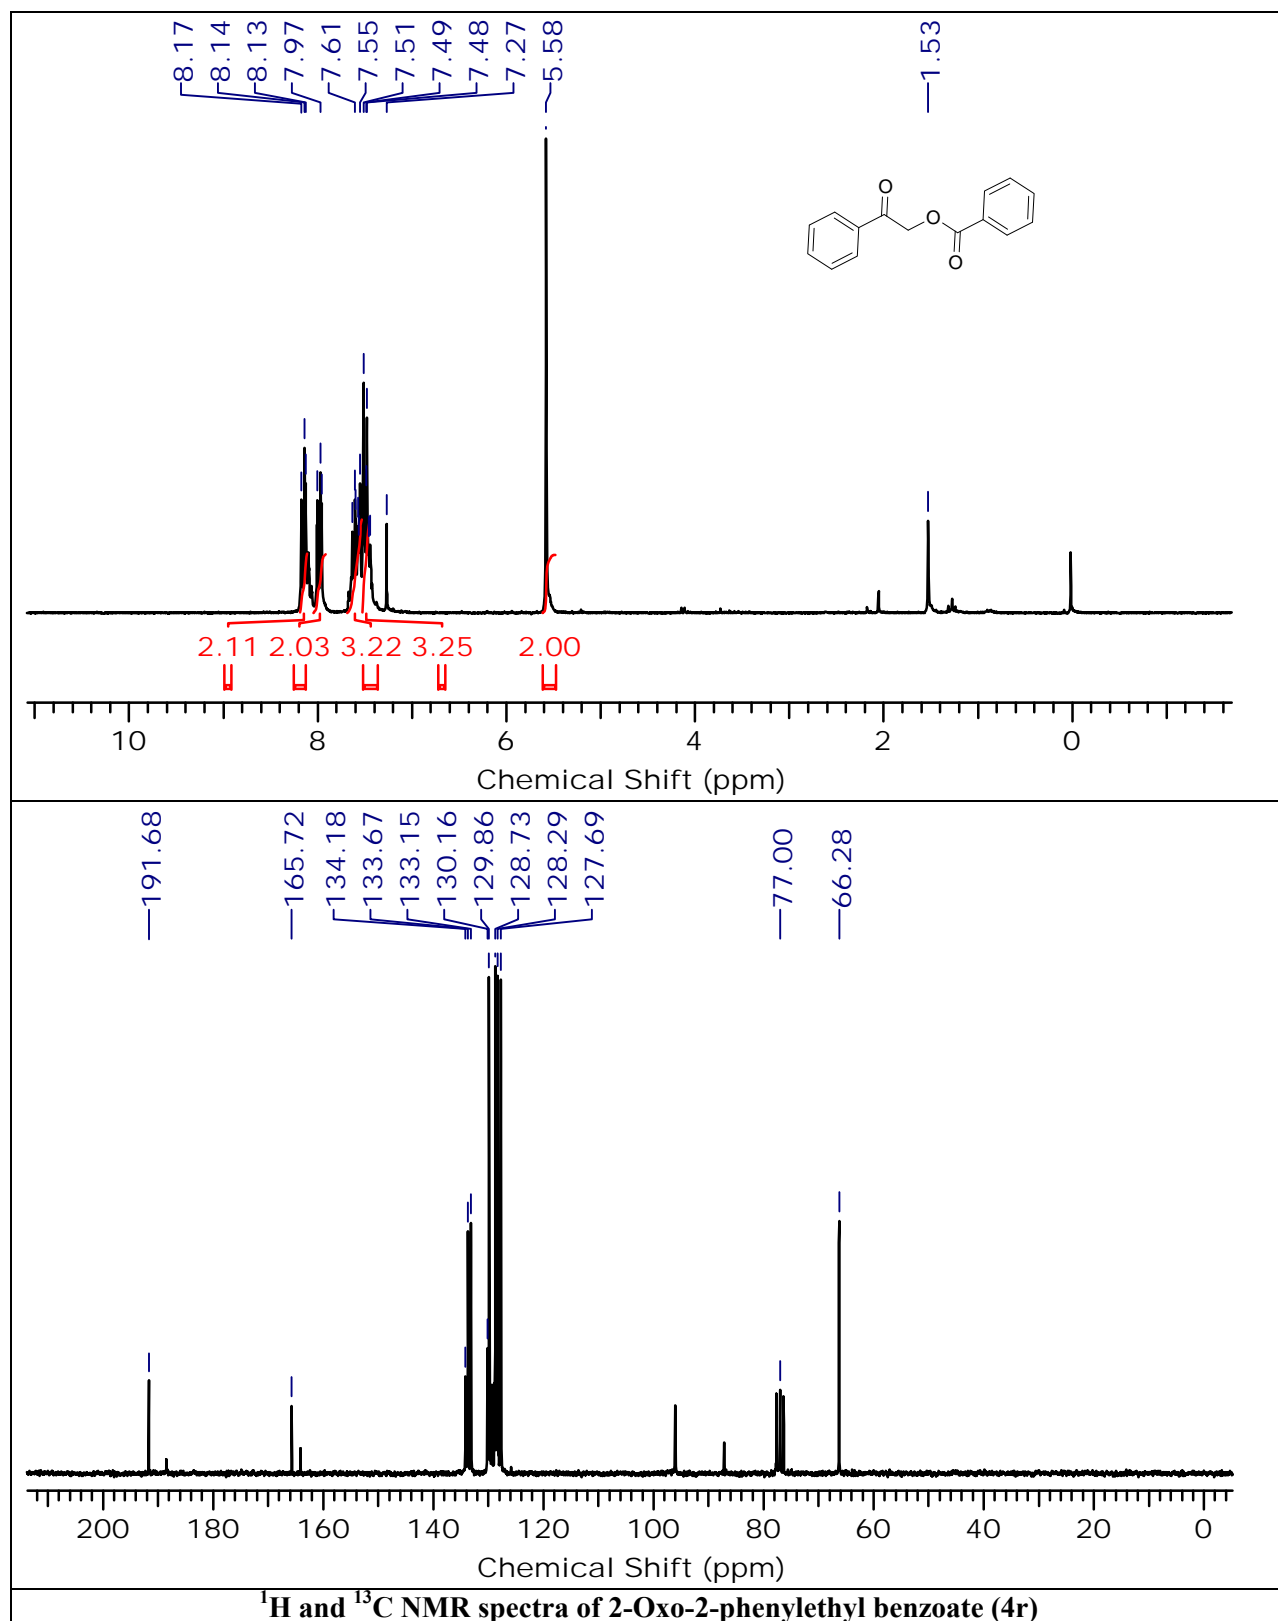

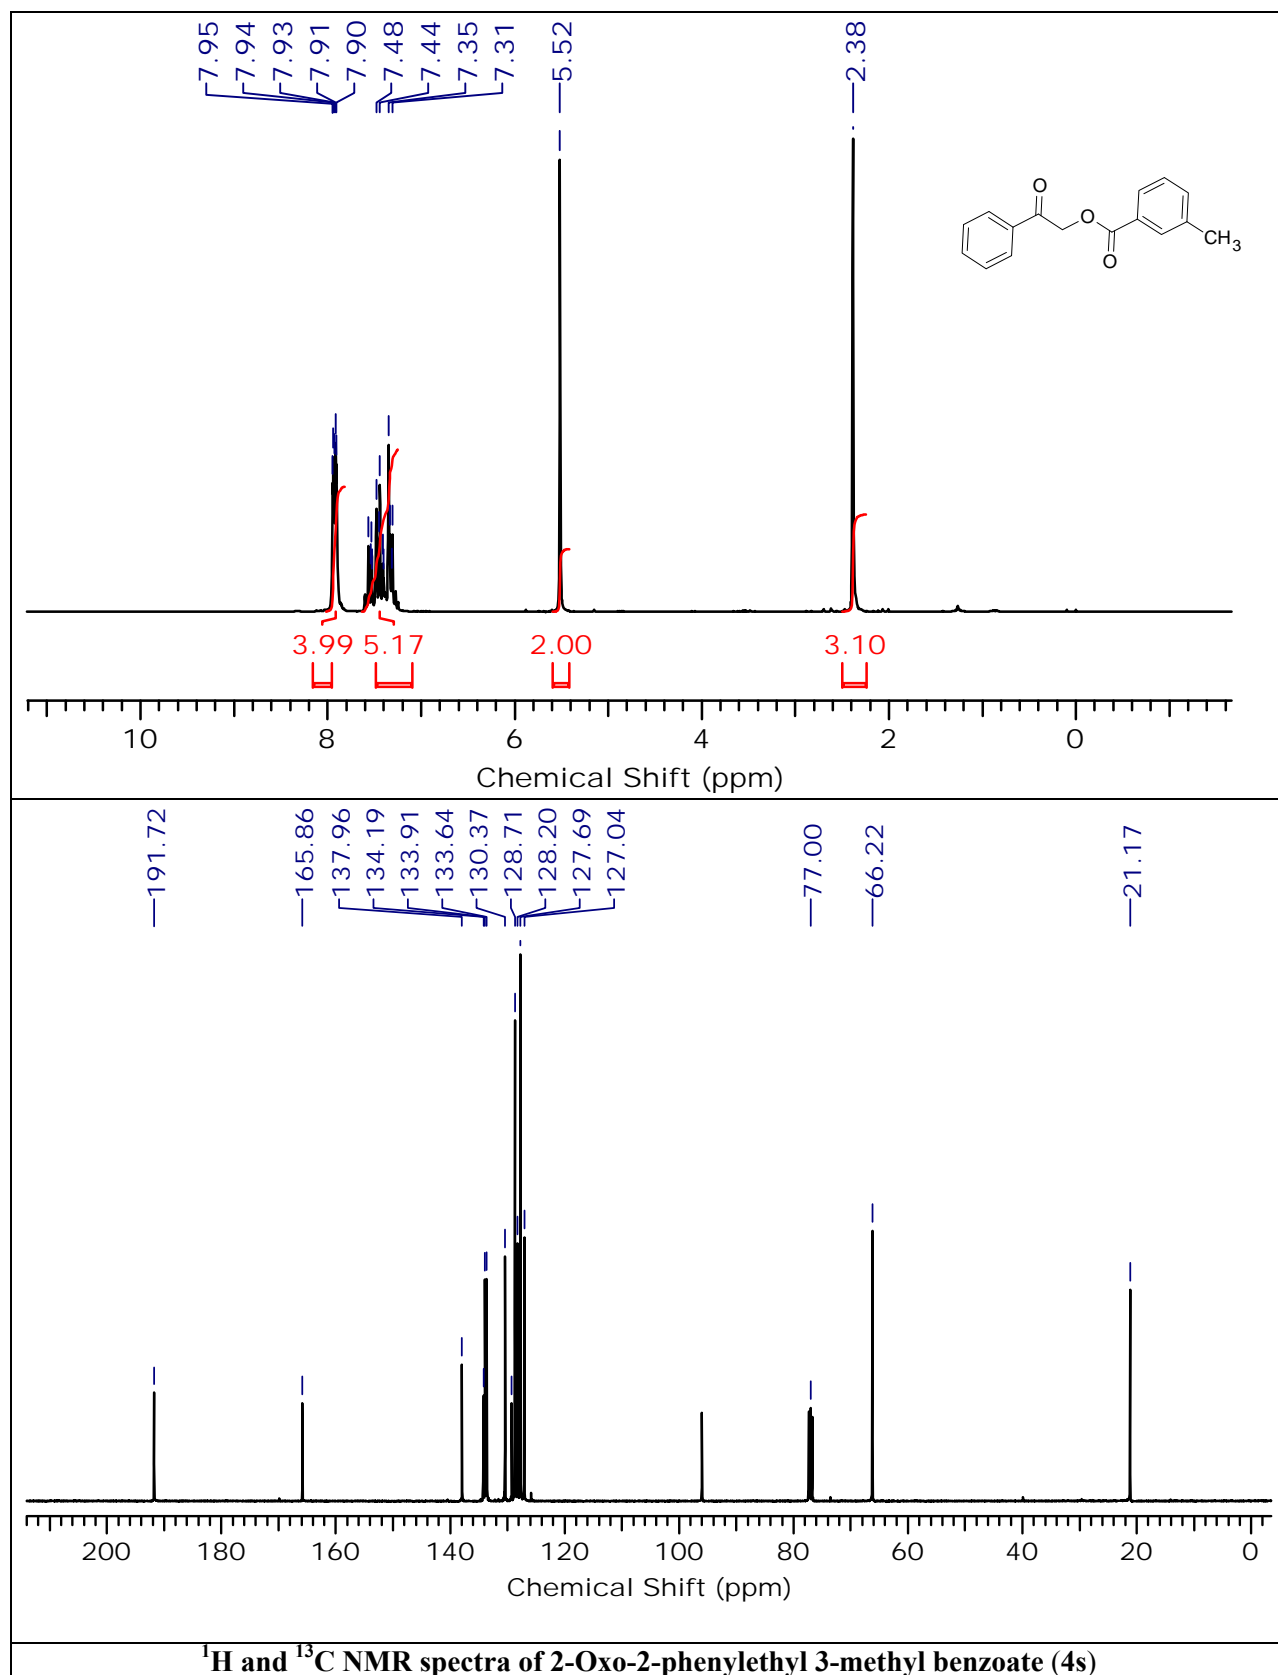

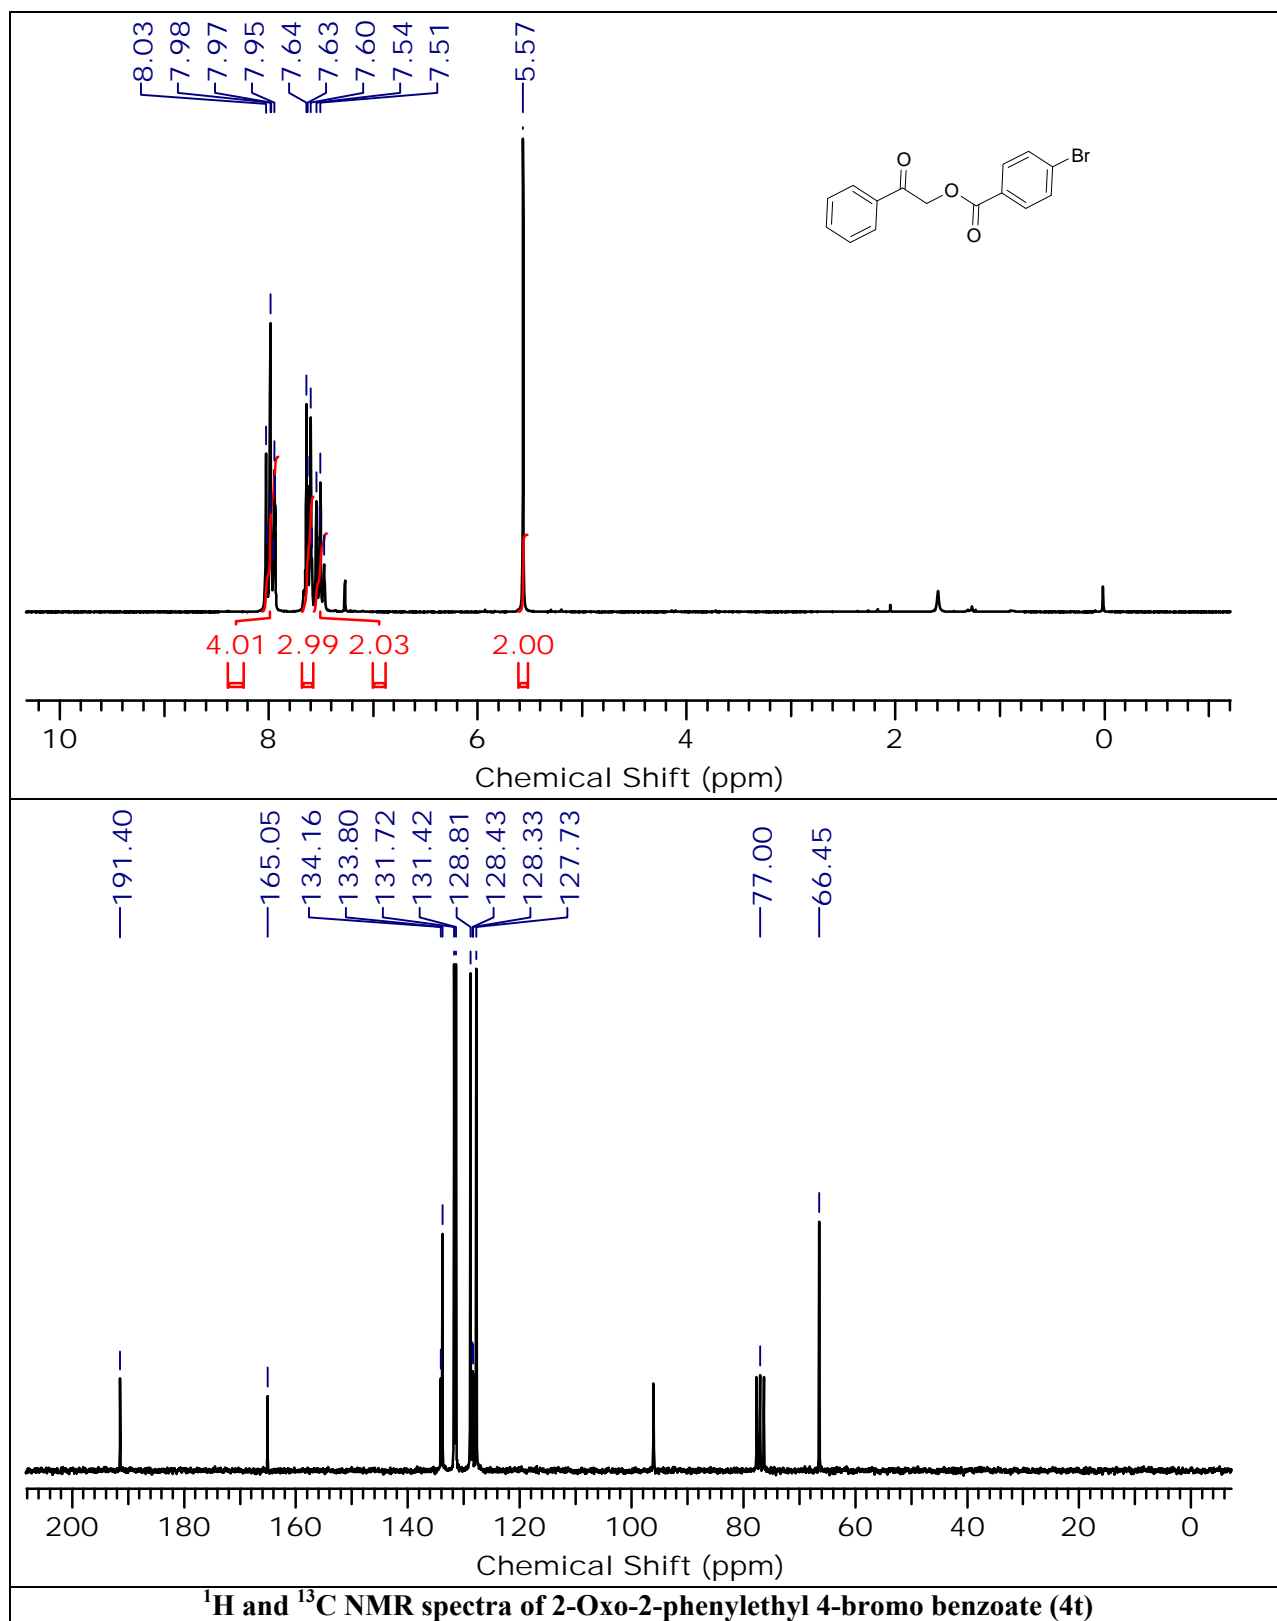

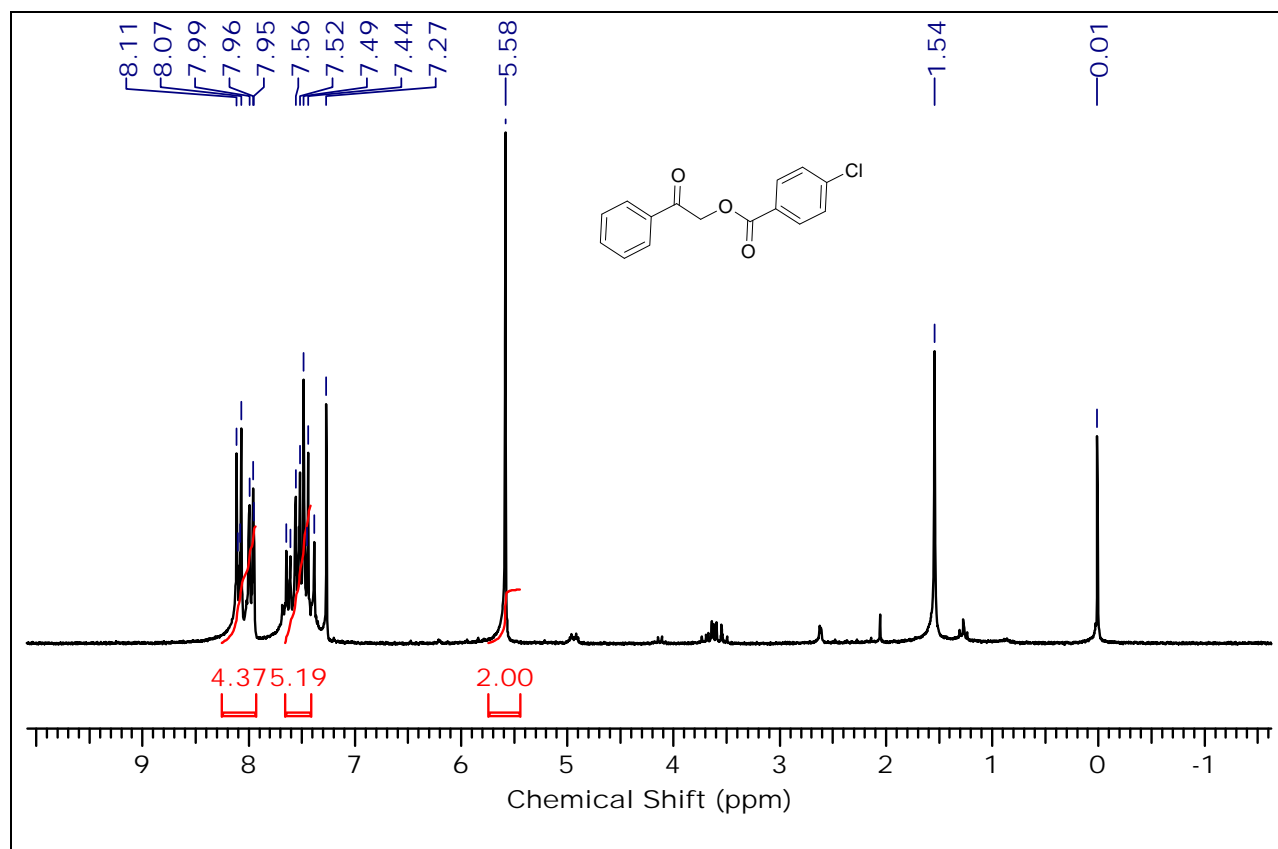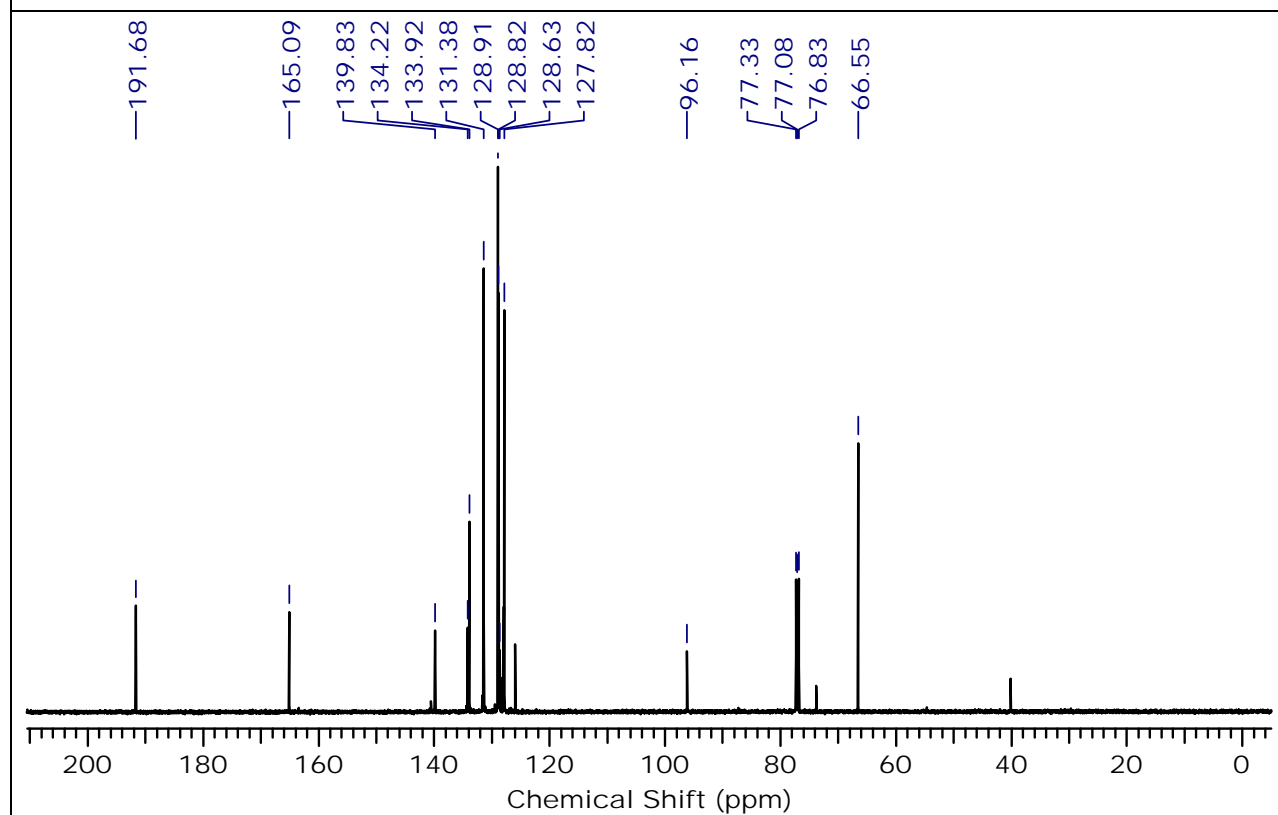

<sup>1</sup>H and <sup>13</sup>C NMR spectra of 2-Oxo-2-phenylethyl 4-chloro benzoate (4u)

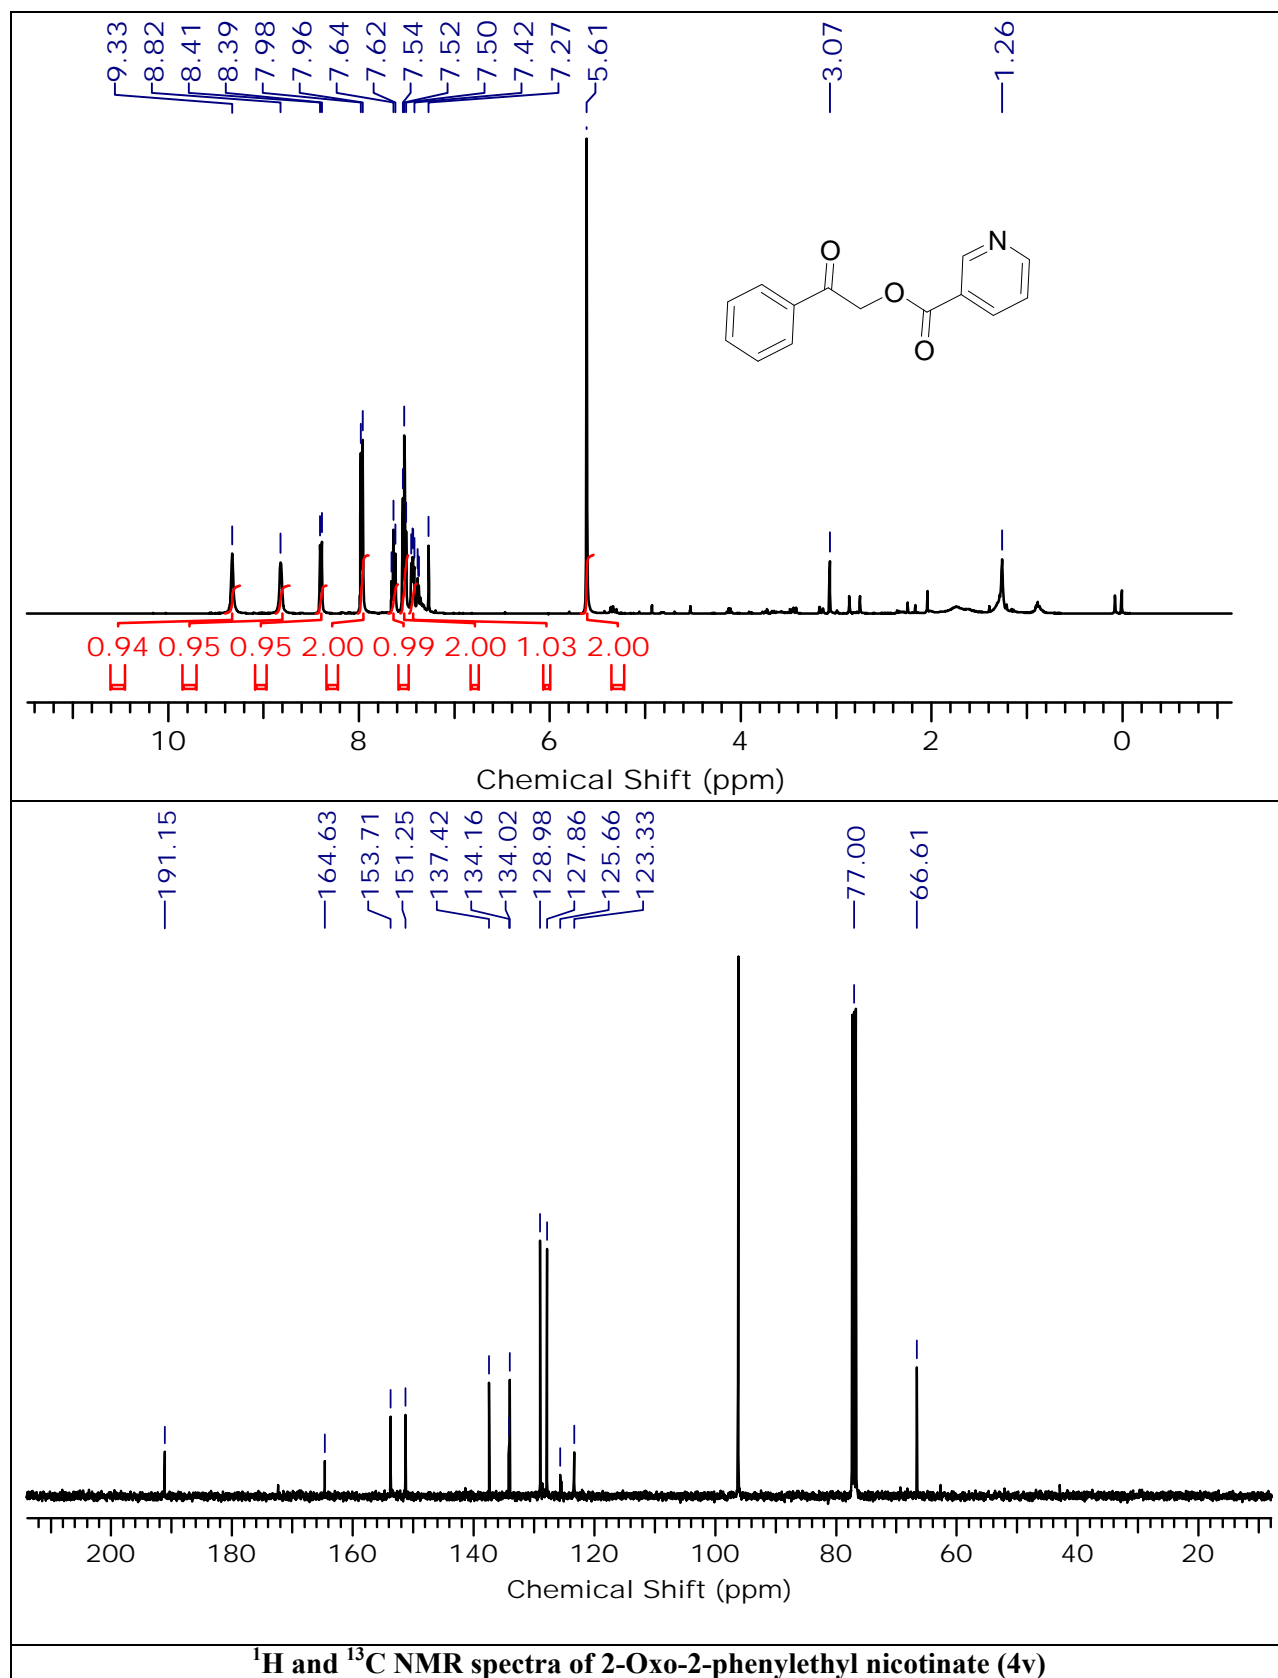

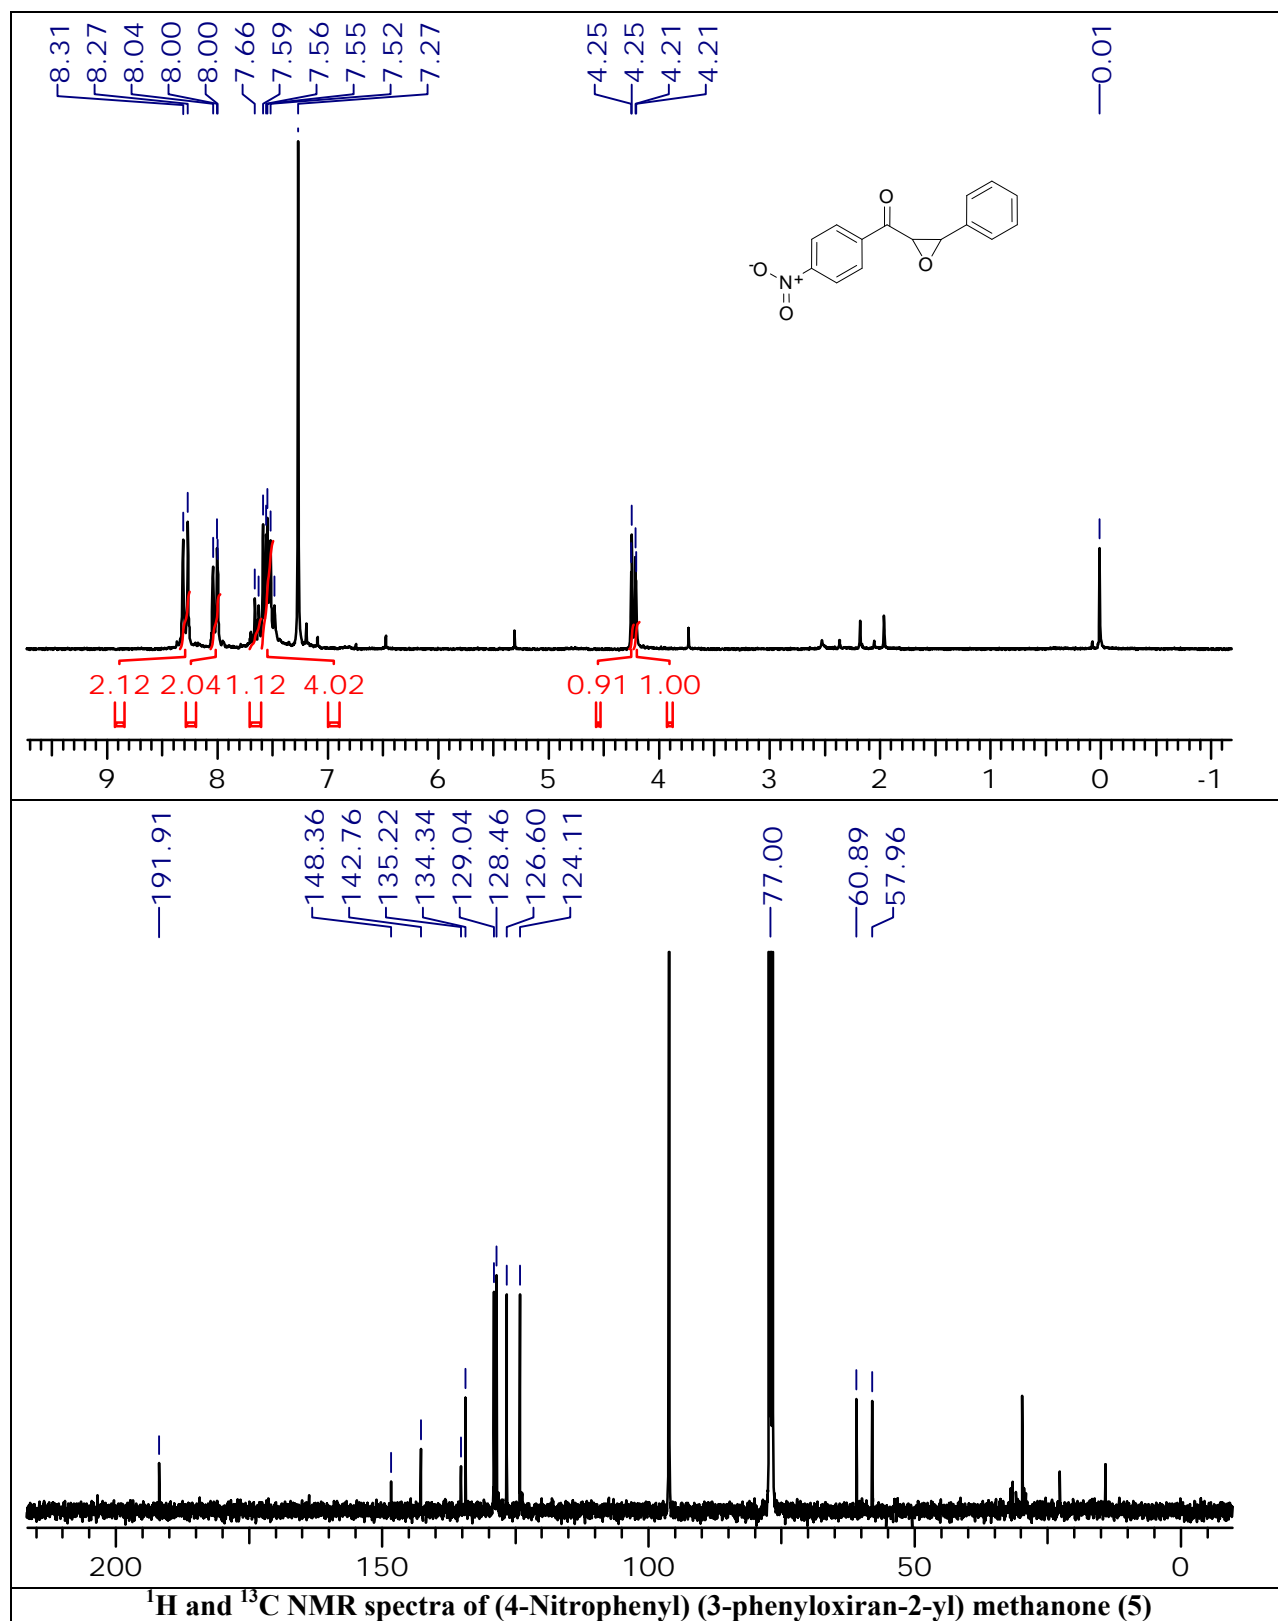

Supplement: c3ob41551a.pdf [file c3ob41551a.pdf]
